1

2 **Differential regulation of cranial and cardiac neural crest by Serum Response**

3 **Factor**

4

5 Colin J. Dinsmore and Philippe Soriano\*

6

7 Department of Cell, Development, and Regenerative Biology

8 Icahn School of Medicine at Mount Sinai

9 New York, NY 10029

10

11 \*Corresponding author: [philippe.soriano@mssm.edu](mailto:philippe.soriano@mssm.edu)

12

13 Keywords: SRF, MRTF, TCF, craniofacial development, neural crest, transcription

14

15

## 16 **Abstract**

17 Serum response factor (SRF) is an essential transcription factor that influences many  
18 cellular processes including cell proliferation, migration, and differentiation. SRF directly  
19 regulates and is required for immediate early gene (IEG) and actin cytoskeleton-related  
20 gene expression. SRF coordinates these competing transcription programs through  
21 discrete sets of cofactors, the Ternary Complex Factors (TCFs) and Myocardin Related  
22 Transcription Factors (MRTFs). The relative contribution of these two programs to *in vivo*  
23 SRF activity and mutant phenotypes is not fully understood. To study how SRF utilizes  
24 its cofactors during development, we generated a knock-in *Srf<sup>fad</sup>* allele in mice harboring  
25 point mutations that disrupt SRF-MRTF-DNA complex formation but leave SRF-TCF  
26 activity unaffected. Homozygous *Srf<sup>fad/fad</sup>* mutants die at E10.5 with notable cardiovascular  
27 phenotypes, and neural crest conditional mutants succumb at birth to defects of the  
28 cardiac outflow tract but display none of the craniofacial phenotypes associated with  
29 complete loss of SRF in that lineage. Our studies further support an important role for  
30 MRTF mediating SRF function in cardiac neural crest and suggest new mechanisms by  
31 which SRF regulates transcription during development.

32

## 33 **Introduction**

34 Multicellular development requires the precise management of cellular behaviors  
35 including proliferation, migration, and differentiation. These are coordinated through  
36 intercellular communication pathways, such as growth factor signaling, that couple  
37 extracellular information with internal effectors, including transcription factors (TFs)  
38 (Fantauzzo & Soriano, 2015; Lemmon & Schlessinger, 2010). The balance between

39 opposing transcription programs is tuned by signaling pathways which activate specific  
40 TFs or in some cases cofactors that direct the behavior of a common TF. One example  
41 of the latter is the essential transcription factor Serum Response Factor (SRF) (Posern &  
42 Treisman, 2006). SRF is necessary for the expression of immediate early genes (IEGs)  
43 in cells stimulated with serum or growth factors, as well as many genes related to the  
44 actin cytoskeleton, contractility, and muscle differentiation.

45

46 SRF binds a conserved DNA regulatory sequence known as a CArG box, a motif found  
47 at many cytoskeletal and growth-factor inducible gene promoters (Mohun et al., 1991;  
48 Norman et al., 1988; Q. Sun et al., 2006). SRF can, however, effect at least two unique  
49 transcriptional programs by coupling with two families of cofactors that compete for a  
50 common binding site on SRF itself (Miano, 2003; Wang et al., 2004) (Figure 1A). The  
51 ternary complex factors (TCFs) are E26 transformation-specific (ETS) family proteins  
52 activated by extracellular signal-regulated kinase 1/2 (ERK1/2) phosphorylation (Mylona  
53 et al., 2016). Once activated, they bind DNA and promote cellular proliferation by  
54 transcribing IEGs in coordination with SRF (Esnault et al., 2017; Gualdrini et al., 2016).  
55 There are three TCF members in mouse and human: ELK1, ELK3/NET, and ELK4/SAP1  
56 (Posern & Treisman, 2006). Opposing SRF-TCF activity are the Myocardin Related  
57 Transcription Factors (MRTFs). These cofactors rely on SRF to bind DNA, promote  
58 cytoskeletal gene expression, and are particularly important in muscle differentiation  
59 (Posern & Treisman, 2006). MRTFs bind to and are inhibited by G-actin. Polymerization  
60 of G-actin into F-actin liberates MRTFs to translocate to the nucleus and bind SRF  
61 (Miralles et al., 2003). This can be promoted by multiple signaling pathways, including

62 phosphoinositide 3-kinase (PI3K), that stimulate guanine nucleotide exchange factors to  
63 activate F-actin-promoting Rho-family GTPases (Brachmann et al., 2005; Hanna & El-  
64 Sibai, 2013; Jimenez et al., 2000; Vasudevan & Soriano, 2014). MRTFs are also  
65 positively and negatively regulated by extensive phosphorylation (Panayiotou et al.,  
66 2016). Three MRTFs are known to interact with SRF: Myocardin itself, MRTF-  
67 A/MKL1/MAL, and MRTF-B (Parmacek, 2007). *Myocd* is expressed specifically in muscle  
68 while *Mrtfa* and *Mrtfb* are more broadly expressed (Posern & Treisman, 2006). A fourth  
69 MRTF, MAMSTR/MASTR, interacts with MEF2 proteins and is not known to bind SRF  
70 (Creemers et al., 2006).

71

72 *Srf* and its cofactors have been extensively studied genetically. *Srf*<sup>-/-</sup> mutant mice die  
73 between E6.5 and E8.5 showing defects in mesoderm formation (Arsenian et al., 1998;  
74 Niu et al., 2005). Cofactor knockouts are comparatively mild. Single TCF mutants are all  
75 fully or partially viable (Ayadi et al., 2001; Cesari et al., 2004; Costello et al., 2004; Weini  
76 et al., 2014) and *Elk1*; *Elk3*; *Elk4* triple null mice have not been described in detail but  
77 survive until E14.5 without obvious defects (Costello et al., 2010; Gualdrini et al., 2016).  
78 *Mrtfa*<sup>-/-</sup> mutant mice are viable (Li et al., 2006; Y. Sun et al., 2006) whereas *Mrtfb*<sup>-/-</sup> mice  
79 are inviable between E13.5-E15.5, exhibiting cardiovascular defects (Li et al., 2012; Oh  
80 et al., 2005). *Myocd*<sup>-/-</sup> mice have the most severe phenotype and die at E10.5, also from  
81 cardiovascular defects (Espinoza-Lewis & Wang, 2014; Li et al., 2003). *Mrtfa*; *Mrtfb*  
82 double null mice have not been described, but conditional double mutants have shown  
83 these factors exhibit redundancy and broadly phenocopy loss of *Srf* in several tissues  
84 and cell types (Cenik et al., 2016; Guo et al., 2018; S. Li et al., 2005; Trembley et al.,

85 2015). However, studies comparing *Srf* and *Mrtfa*; *Mrtfb* mutants are not always identical.  
86 In megakaryocytes, loss of *Mrtfa* and *Mrtfb* is more severe than loss of *Srf* and there are  
87 large gene expression differences in the two models (Smith et al., 2012). Indeed, there is  
88 evidence that MRTFs may regulate genes independent of SRF or act as cofactors for TFs  
89 other than SRF (Asparuhova et al., 2011; Kim et al., 2017). Whether the differences in  
90 *Srf* versus *Mrtfa*; *Mrtfb* loss-of-function studies are due to SRF-TCF activity, SRF-  
91 independent MRTF activity, or TCF/MRTF-independent SRF activity remains uncertain.

92  
93 One tissue in which SRF was found to be essential is the neural crest (NC) (Newbern et  
94 al., 2008; Vasudevan & Soriano, 2014). The NC is a transient developmental population  
95 of cells that arises from the dorsal neural tube, migrates ventrally throughout the embryo,  
96 and gives rise to numerous cell types including the bone and connective tissue of the  
97 face, as well as smooth muscle cells in the cardiac outflow tract (Bronner & Simoes-Costa,  
98 2016). The extensive migration, proliferation, and various differentiation outcomes these  
99 cells undergo requires accurate coordination, and decades of study have revealed a  
100 panoply of signaling pathways and transcription factors important in these processes,  
101 including the fibroblast growth factor (FGF) pathway, platelet-derived growth factor  
102 (PDGF) pathway, and SRF itself (Brewer et al., 2015; Dinsmore & Soriano, 2018;  
103 Newbern et al., 2008; Rogers & Nie, 2018; Tallquist & Soriano, 2003; Vasudevan &  
104 Soriano, 2014). We and others have previously shown that *Srf* is required in the NC for  
105 craniofacial and cardiovascular development (Newbern et al., 2008; Vasudevan &  
106 Soriano, 2014). Intriguingly, mice homozygous for a hypomorphic allele of *Mrtfb* die  
107 shortly after birth with cardiac outflow tract defects and can be rescued by a neural crest-

108 specific transgene (J. Li et al., 2005). Assays in mouse embryonic palatal mesenchyme  
109 cells (MEPMs) indicated that stimulation with the secreted ligands Fibroblast Growth  
110 Factor (FGF) or Platelet-Derived Growth Factor (PDGF) promoted SRF-TCF complex  
111 formation, but only PDGF promoted SRF-MRTF interactions, in a PI3K-dependent  
112 manner (Vasudevan & Soriano, 2014). Supporting the importance of SRF-MRTF  
113 interactions, *Srf* interacted genetically with *Pdgfra* but not *Fgfr1* in NC (Vasudevan &  
114 Soriano, 2014). However, the contributions of each SRF-cofactor transcriptional program  
115 to the overall *Srf* NC phenotype are unclear.

116

117 In this study, we further characterize the molecular consequences of losing *Srf* expression  
118 in the NC through marker analysis and expression profiling, finding the most highly-  
119 downregulated genes to be cytoskeletal in nature. We then test the presumed  
120 requirement of SRF-MRTF interactions using a novel *Srf<sup>cd</sup>* allele carrying mutations that  
121 prevent SRF-MRTF-DNA ternary complex formation to circumvent MRTF redundancy  
122 and control for possible SRF-independent MRTF activity. These embryos have striking  
123 developmental defects that are outwardly similar to *Myocd* mutant mice. Conditional NC  
124 mutants reveal an essential role for optimal SRF-MRTF activity in the cardiac crest,  
125 whereas the mutation is well-tolerated in the cranial NC. These observations raise the  
126 possibility that non-cardiovascular tissue may be able to develop with only minimal SRF-  
127 MRTF activity or that SRF can support cytoskeletal gene expression on its own or with  
128 other cofactors.

129

130 **Results**

131 *Srf*<sup>flox/flox</sup>; *Wnt1-Cre*<sup>Tg/+</sup> mice develop a midfacial cleft and bleb, characterized by reduced  
132 *cytoskeletal gene expression*. To establish a phenotypic baseline for embryos lacking *Srf*  
133 in NC, we first examined conditional null embryos at E11.5 and E12.5 and assessed their  
134 morphology. Consistent with our previous study, a midfacial cleft develops from E10.5 to  
135 E11.5, becoming prominent at E11.5 as a failure of the medial nasal process and lateral  
136 nasal process (MNP and LNP, respectively) to converge at the midline (Figure 1B-C)  
137 (Vasudevan & Soriano, 2014). By E12.5, a fluid-filled bleb develops at the midline, often  
138 with hemorrhaging into the midfacial cavity (Figure 1B). Embryos turned necrotic starting  
139 at E12.5 and did not survive past E13.5.

## A Figure 1

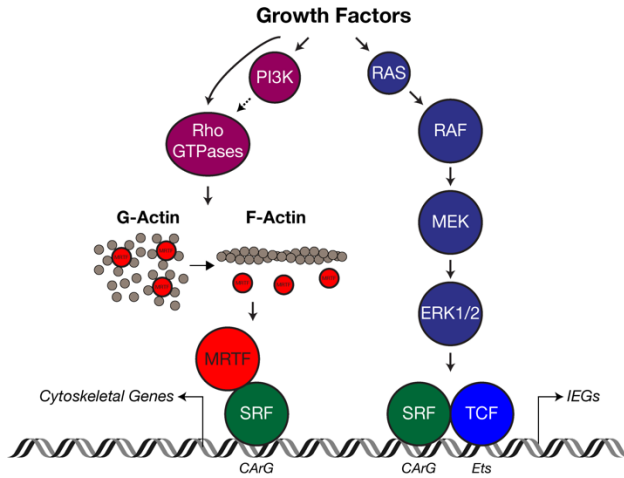

## B

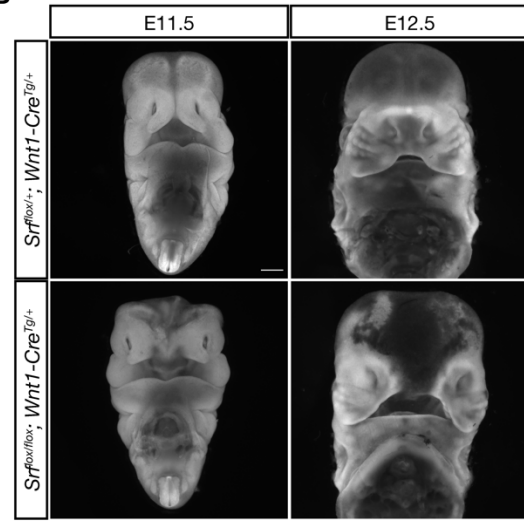

## C

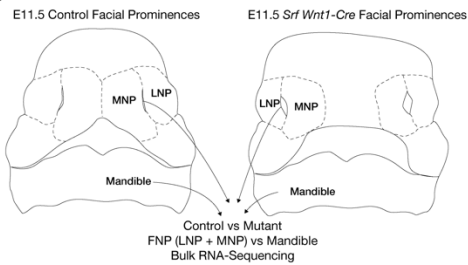

## D

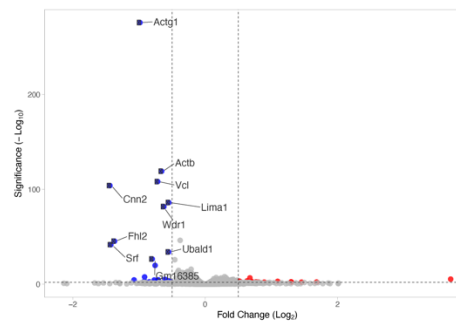

## E

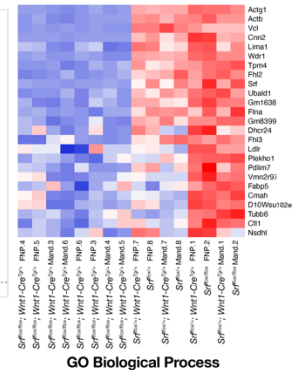

## F

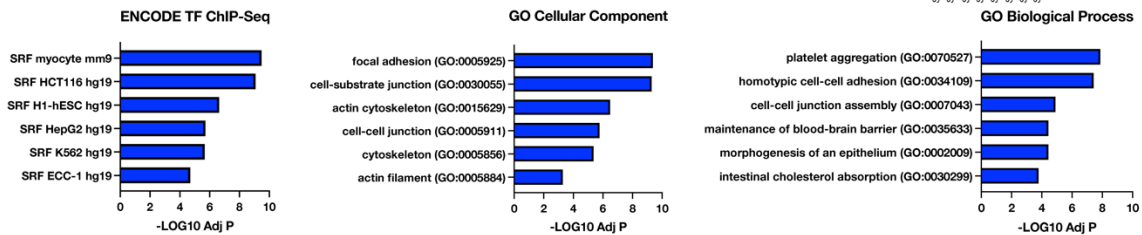

## G

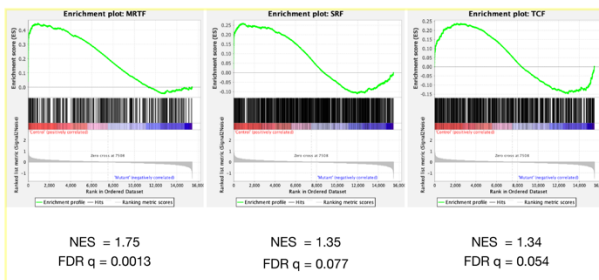

## H

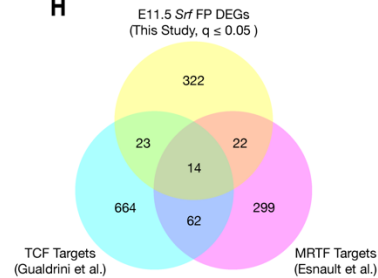

## I

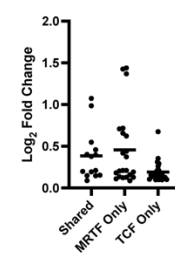

140

141

142



## Figure 1

### *Loss of Srf in NC affects cytoskeletal gene expression*

(A) Diagram depicting SRF, its TCF and MRTF cofactors, and the upstream signals that regulate them. (B) DAPI stained embryos at E11.5 and E12.5 show a facial cleft following loss of *Srf* in NC. Scale bar represents 1mm. (C) Diagram depicting RNA-sequencing strategy. (D) Volcano plot showing DEGs in *Srf* NC conditional mutants. Genes with a p value < 0.01 and log<sub>2</sub> fold change (FC) > 0.25 are colored. Select genes are labeled. (E) A heatmap of the top 25 DEGs by q value. The samples cluster by genotype and are color-coded by Z-score. (F) Gene set enrichment analysis (GSEA) using a list of DEGs with q ≤ 0.05 and Log<sub>2</sub>FC ≤ -0.25. Enrichment for ENCODE TF ChIP-Seq, GO Cellular Component, and GO Biological Process are shown. (G) GSEA for known SRF, MRTF, and TCF ChIP targets from previous datasets (Esnault et al., 2014; Gualdrini et al., 2016) across our entire dataset. (H) Overlap of known MRTF and TCF targets with DEGs q ≤ 0.05. (I) Absolute value of log<sub>2</sub> FC for DEGs that overlap with each category. Horizontal bar indicates the mean (0.385 Shared, 0.378 MRTF, 0.219 TCF).

143 We sought to better understand the molecular defects that underly this outcome. As *Srf*  
144 has been implicated in mediating cell differentiation, we asked whether early craniofacial  
145 patterning was affected. However, expression of the differentiation markers *Msx1*  
146 (craniofacial mesenchyme), *Alx3* (MNP and LNP mesenchyme, medial mandibular  
147 mesenchyme), and *Six3* (ventral forebrain, nasal placode, eye), as well as the markers  
148 of patterning centers *Shh* (ventral forebrain, weak oral MNP and mandibular epithelium),  
149 and *Fgf8* (ventral forebrain, oral MNP and epithelium) were all unaffected at E10.5 as  
150 assessed by *in situ* hybridization, suggesting craniofacial patterning was largely normal  
151 at this stage (Figure 1 Supplement 1).

152

## Figure 1 Supplement 1

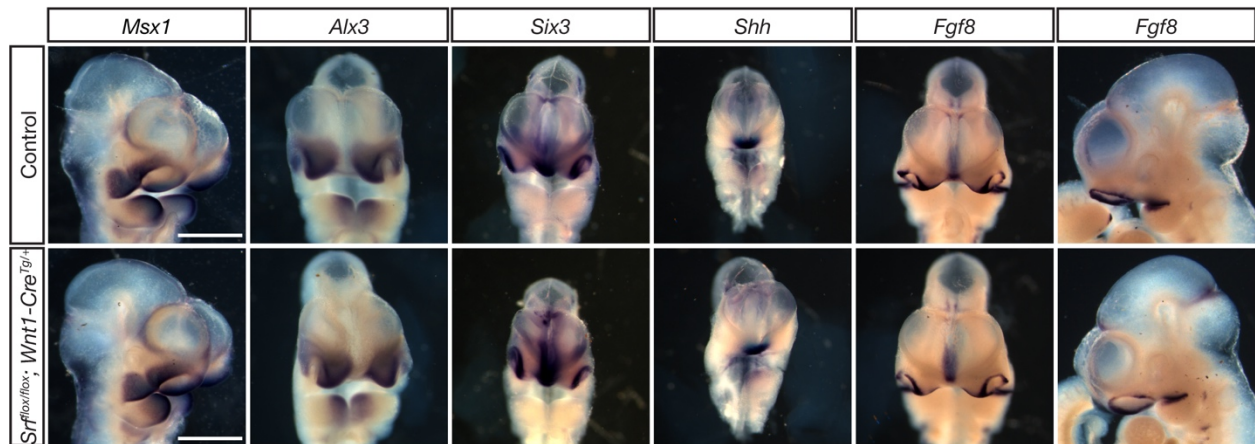

153

### Figure 1 Supplement 1

#### *Srf* NC conditional mutants do not show early patterning defects

E10.5 embryos subject to *in situ* hybridization using probes against *Msx1*, *Alx3*, *Six3*, *Shh*, and *Fgf8* showed no significant differences between *Srf* NC conditional mutants and control littermates. *Msx1* embryos are shown in 3/4 view to highlight maxillary expression. *Fgf8* embryos are shown in frontal and profile views to highlight the ventral forebrain and mandibular expression domains, respectively. Scale bar represents 500  $\mu\text{m}$ .

154

155 We next sought to identify differentially expressed genes (DEGs) through bulk RNA-  
156 sequencing of control and mutant frontonasal prominences (FNP, i.e. MNP + LNP) and  
157 mandibles at E11.5. To confirm the quality of the dataset and suitability of the analysis  
158 pipeline, we first compared mandible versus FNP gene expression among all samples  
159 and identified differentially expressed transcripts encoding 4084 DEGs ( $q \leq 0.05$ , Wald  
160 test), among them known regulators of mandible or FNP identity, such as *Hand2* and *Six3*  
161 (Figure 1 Supplement 2A-B). Principal component analysis showed strong separation of  
162 the samples by tissue (Figure 1 Supplement 2C). We next identified DEGs in control  
163 versus *Srf<sup>flox/flox</sup>; Wnt1-Cre<sup>Tg/+</sup>* mandibles and FNPs. Mandibles showed 40 DEGs and  
164 FNPs 219 ( $q \leq 0.05$ , Wald test). A joint model including both tissue samples and  
165 accounting for tissue-of-origin identified 381 DEGs (Figure 1D-E). *Srf* itself was among

166 the top DEGs, confirming efficient conditional deletion in the cranial NC (Figure 1D-E,  
 167 Figure 1 Supplement 2D).

168

Figure 1 Supplement 2

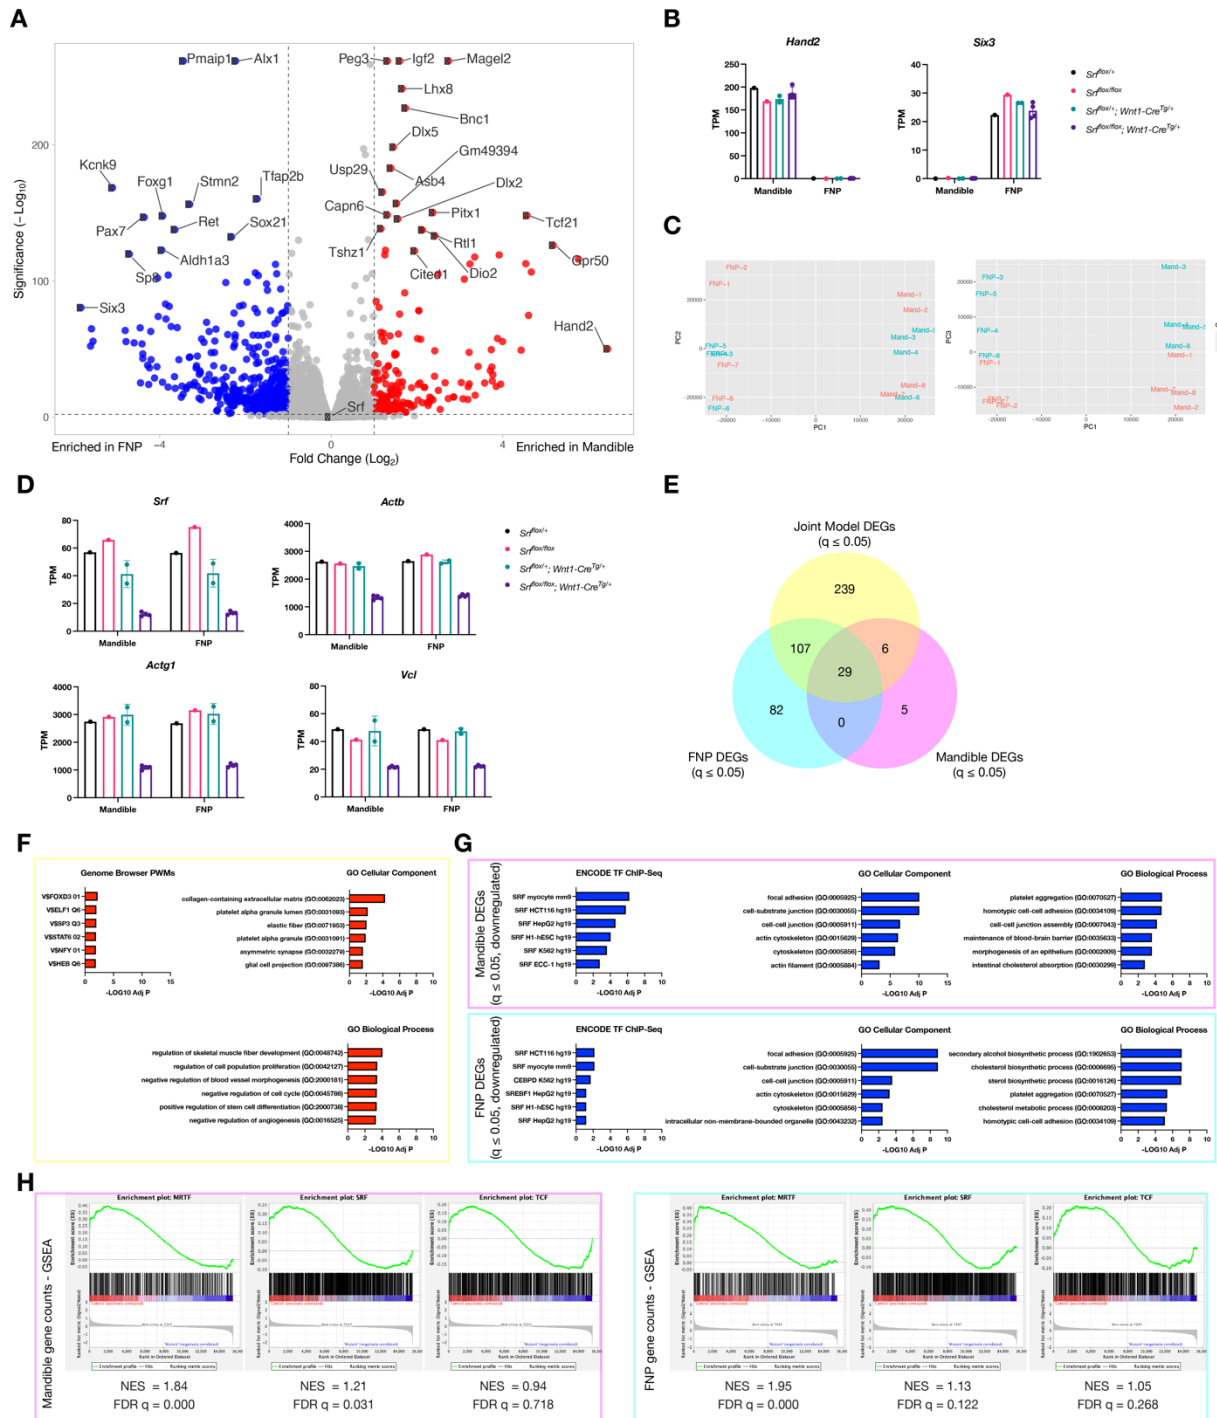

169

## Figure 1 Supplement 2

### *Additional data related to craniofacial RNA-Seq*

(A) Volcano plot showing genes enriched in mandible (red) versus FNP (blue) tissue. (B) Individual transcripts per million reads (TPM) values for *Hand2* and *Six3* plotted by genotype, showing the expected tissue enrichment. (C) PCA plots for the individual samples showing PCA1 vs PCA2 (left) and PCA1 vs PCA3 (right) indicate separation of the samples by tissue (PCA1) and genotype (PCA3). Samples are color-coded by genotype. (D) TPM values of *Srf* and several affected genes plotted by genotype. While *Srf* levels vary somewhat among the non-clefted control genotypes, downstream targets are only affected in the conditional mutants. (E) Overlap of DEGs from mandible (pink), FNP (cyan), and a joint model using both tissues (yellow). (F) Enrichr GSEA for upregulated genes with  $q \leq 0.05$  and  $\text{Log}_2\text{FC} \geq 0.25$  from the joint model shows little enrichment and such genes may therefore be indirect targets of SRF. (G) Enrichr GSEA using a list of genes with  $q \leq 0.05$  and  $\text{Log}_2\text{FC} \leq -0.25$  from each tissue showing similar terms to the joint model, with the exception of cholesterol-related GO terms specific to the FNP dataset. (H) GSEA for mandible and FNP samples compared to known SRF, MRTF, and TCF targets (Esnault et al., 2014; Gualdrini et al., 2016) showing preferential enrichment for MRTF targets in both datasets. Columns are the mean and error bars represent the standard deviation in (B) and (D).

170

171 The most differentially expressed genes primarily encoded cytoskeletal genes that were  
172 known targets of SRF-MRTF activity, including *Actg1*, *Cnn2*, *Vcl*, *Actb*, and *Cfl1* (Figure  
173 1D-E). We subjected a more stringent list of 43 downregulated and 36 upregulated genes  
174 with  $q \leq 0.05$  and  $\text{Log}_2\text{FC} \geq 0.25$  to gene set enrichment analysis using the online tool  
175 Enrichr (Xie et al., 2021). Downregulated genes were enriched for cytoskeletal GO terms  
176 and SRF-binding motifs (Figure 1F), whereas upregulated genes showed little enrichment  
177 for either TF motifs or GO terms and may not be direct SRF targets (Figure 1 Supplement  
178 2F). We then used gene set enrichment analysis to compare our results with known  
179 targets of SRF, MRTF, and TCF (Esnault et al., 2014; Gualdrini et al., 2016)  
180 (Supplementary File 1). All three gene lists showed enrichment in our dataset, but the  
181 MRTF list was most significantly enriched (Figure 1G). Furthermore, limiting this  
182 comparison to DEGs with  $q \leq 0.05$ , genes bound by MRTF or MRTF and TCF were more  
183 significantly affected (higher fold change) than those bound by TCF alone (Figure 1H-I).

184 We also performed these analyses on the individual FNP and Mandible datasets that  
185 yielded similar enrichment for SRF motifs, cytoskeleton-related GO terms, and a stronger  
186 enrichment for known MRTF targets than for TCF targets (Figure 1 Supplement 2G-H).  
187 The one major difference between the tissues was that the FNP dataset contained a  
188 group of uniquely affected genes that enriched for terms related to cholesterol  
189 metabolism, but these were not further investigated (Figure 1 Supplement 2G, GO  
190 Biological Process).

191

192 In summary, our gene expression analysis found that the genes most affected by loss of  
193 *Srf* in both mandible and FNP were enriched for cytoskeleton-related established SRF-  
194 MRTF targets. These data, coupled with our previous observations that *Pdgfra* interacted  
195 genetically with *Srf* in NC and PDGF stimulation promoted SRF-MRTF complex  
196 formation, led us to hypothesize that SRF-MRTF interactions would be critical for  
197 midfacial development.

198

199 *Srf* <sup>$\alpha/\alpha$</sup>  *succumb during early organogenesis with cardiovascular defects*. In order to test  
200 the requirement for SRF-MRTF interactions genetically, we introduced four knock-in point  
201 mutations to the  $\alpha$ 1 helix of the SRF DNA-binding domain, previously shown to disrupt  
202 SRF-MRTF-DNA ternary complex formation while leaving SRF-TCF-DNA complex  
203 formation unaffected (Figure 2 Supplement 1A-C) (Hipp et al., 2019; Zaromytidou et al.,  
204 2006). Underscoring their importance, we found these residues are conserved in *Srf*  
205 orthologs from human to sponge, though they are intriguingly less well-conserved in  
206 clades lacking a readily identifiable *Mrtf* ortholog (Figure 2 Supplement 2). We included

207 an N-terminal 3xFLAG tag in the *Srf*<sup>αI</sup> allele. As a control, we generated a separate *Srf*<sup>FLAG</sup>  
 208 tagged line without the αI helix mutations.  
 209

### Supplementary Figure 2 Supplement 1

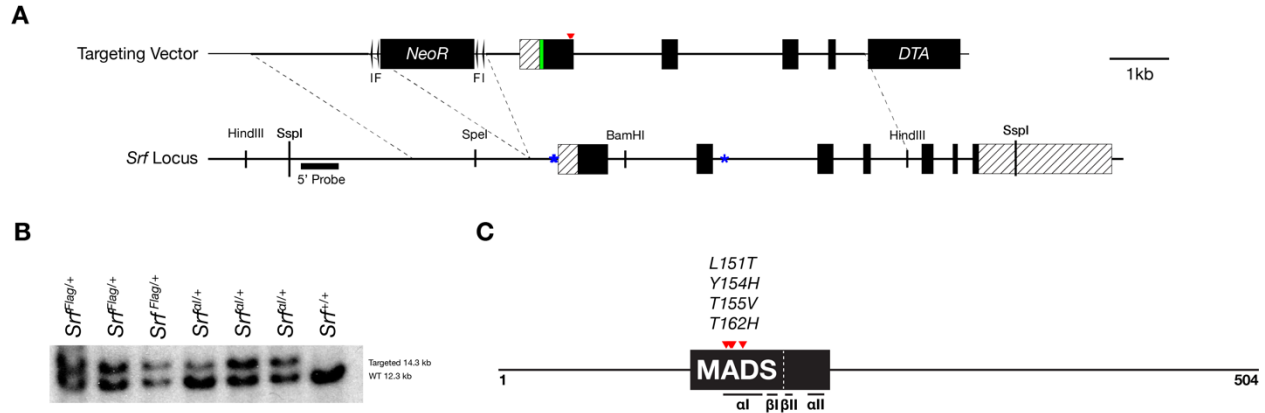

210

### Figure 2 Supplement 1

#### Targeting strategy and validation for *Srf*<sup>Flag</sup> and *Srf*<sup>αI</sup> alleles

(A) A diagram of the targeting vector and the *Srf* locus. Homology arms containing an N-terminal 3x FLAG tag with or without mutated SRF αI residues were cloned into a targeting vector containing a *Pgk-NeoR* cassette flanked by loxP (I) and FRT (F) sequences. Dotted lines demarcate the homology arms relative to the endogenous locus. Exons are dark and UTR regions are striped. The FLAG tag is green and the location of the SRF αI residues is marked by red arrowheads. Autoregulatory CarG elements at -62 bp, -82 bp, and +2800 bp are marked by blue asterisks. (B) Southern blot of SspI digested targeted clones and WT genomic DNA blotted with the P32 labeled DNA probe indicated in (A). (C) Diagram of mouse SRF protein showing the DNA-binding domain as a dark box, the core MADS domain within it is labeled, subdomains are indicated underneath, and the SRF αI mutations are red arrowheads. Domains are based on Zaromytidou et al. (2006) with amino acid numbers adjusted for mouse. The 3x FLAG tag (not shown) was inserted just downstream of the start codon.

211

212



Figure 2 Extended Data 2

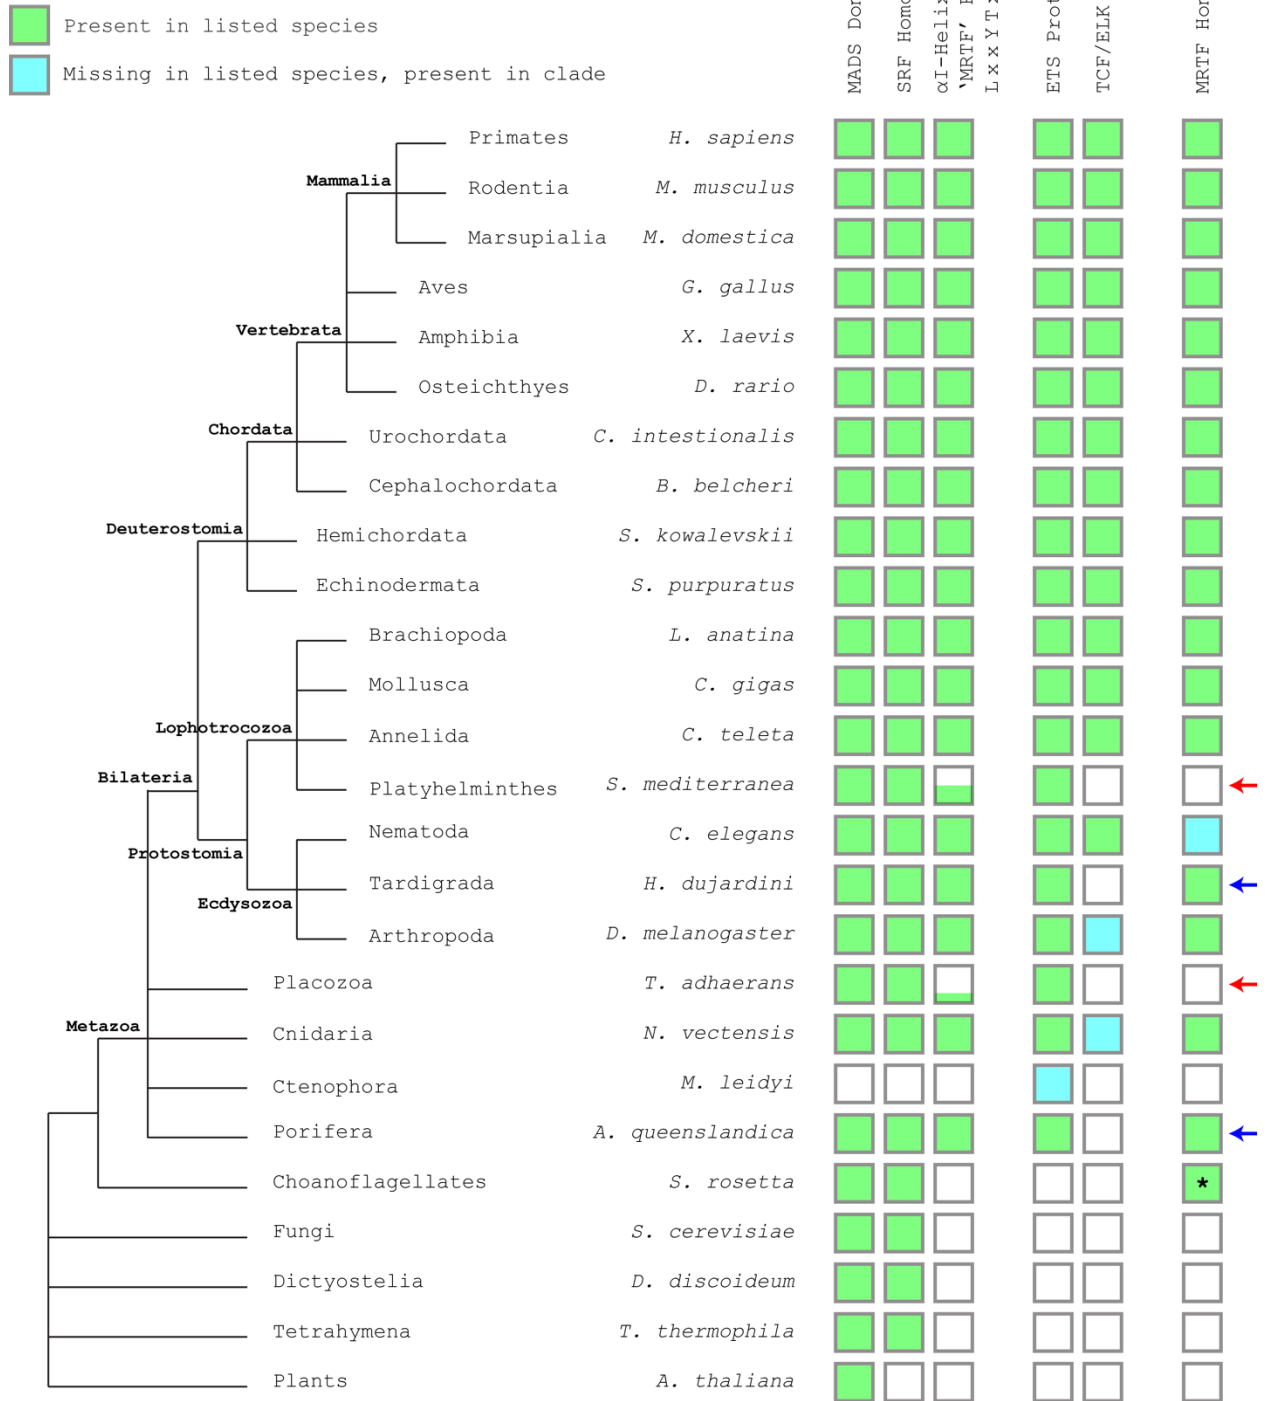

213

## Figure 2 Supplement 2

### *SRF $\alpha$ helix residues are highly conserved, but drift in clades lacking clear MRTF homologues*

Representative species from major clades were subjected to BLASTP searches for mouse SRF, MRTF-B, and ELK1. The presence of a reciprocal best BLASTP hit is denoted in green. If a hit was negative, the search was repeated for the entire clade and identification of a hit is represented in cyan. Negative hits for ELK1 were researched with mouse ETS1 to find any ETS domain proteins. SRF  $\alpha$  residues were manually inspected and divergence is denoted by the height of the green bar in 25% increments, representing the four residues. Red arrows indicate clades where the SRF  $\alpha$  residues diverge that are also missing readily identifiable MRTF homologs, although some of these lineages also lack TCF/ELK homologs. Blue arrows indicate clades where SRF  $\alpha$  residues are conserved along with presence of an MRTF homolog, but that lack an obvious TCF/ELK homolog. The asterisk indicates that although a reciprocal best BLASTP hit for MRTF-B was found in *S. rosetta*, the hit was a short protein fragment and it is unclear if it represents a true MRTF homolog. The genus *Caenorhabditis* lacks an obvious MRTF homolog, but likely MRTF homologs can be found in other nematodes such as *B. malayi*, *L. loa*, and *O. flexuosa*.

214 *Srf*<sup>FLAG/FLAG</sup> mice were viable and fertile, confirming that neither the FLAG tag nor targeting  
215 strategy affected development. In contrast, no *Srf* <sup>$\alpha$ / $\alpha$</sup>  mice were found at weaning age  
216 (Table 1). Because we observed no stillborn or dying neonates, we examined embryos  
217 at different stages. *Srf* <sup>$\alpha$ / $\alpha$</sup>  embryos were recovered in Mendelian ratios until E10.5 but  
218 were easily identifiable from E9.5 onward due to their obvious morphological differences  
219 from control littermates. Mutant embryos were slightly smaller at E9.5 and most had  
220 turning defects that ranged in severity from incompletely turned to totally unturned (Figure  
221 2A). This was accompanied by a wavy neural tube, as seen in many embryos with a  
222 deficiency in mesoderm (Figure 2A, middle embryo) and some embryos showed a delay  
223 in anterior neural tube closure, indicated by the open midbrain (Figure 2A). Mutant  
224 embryos also had a missing or hypoplastic second pharyngeal arch (Figure 2A,  
225 asterisks). Additionally, the yolk sac showed a crinkled appearance with numerous red  
226 blood cells, but no obvious mature blood vessels, indicating the onset of primitive  
227 hematopoiesis but not vasculogenesis (Figure 2B).



| Genotype                   | Expected | Observed |
|----------------------------|----------|----------|
| <i>Srf<sup>+/+</sup></i>   | 7.75     | 12       |
| <i>Srf<sup>al/+</sup></i>  | 15.5     | 19       |
| <i>Srf<sup>al/al</sup></i> | 7.75     | 0        |

$\chi^2$  Test = 0.0044

**Table 1**

*Srf<sup>al/al</sup> embryos are not recovered at weaning*

Expected and recovered numbers of embryos of each genotype at weaning (P21). No homozygous mutant embryos were recovered.

**Figure 2**

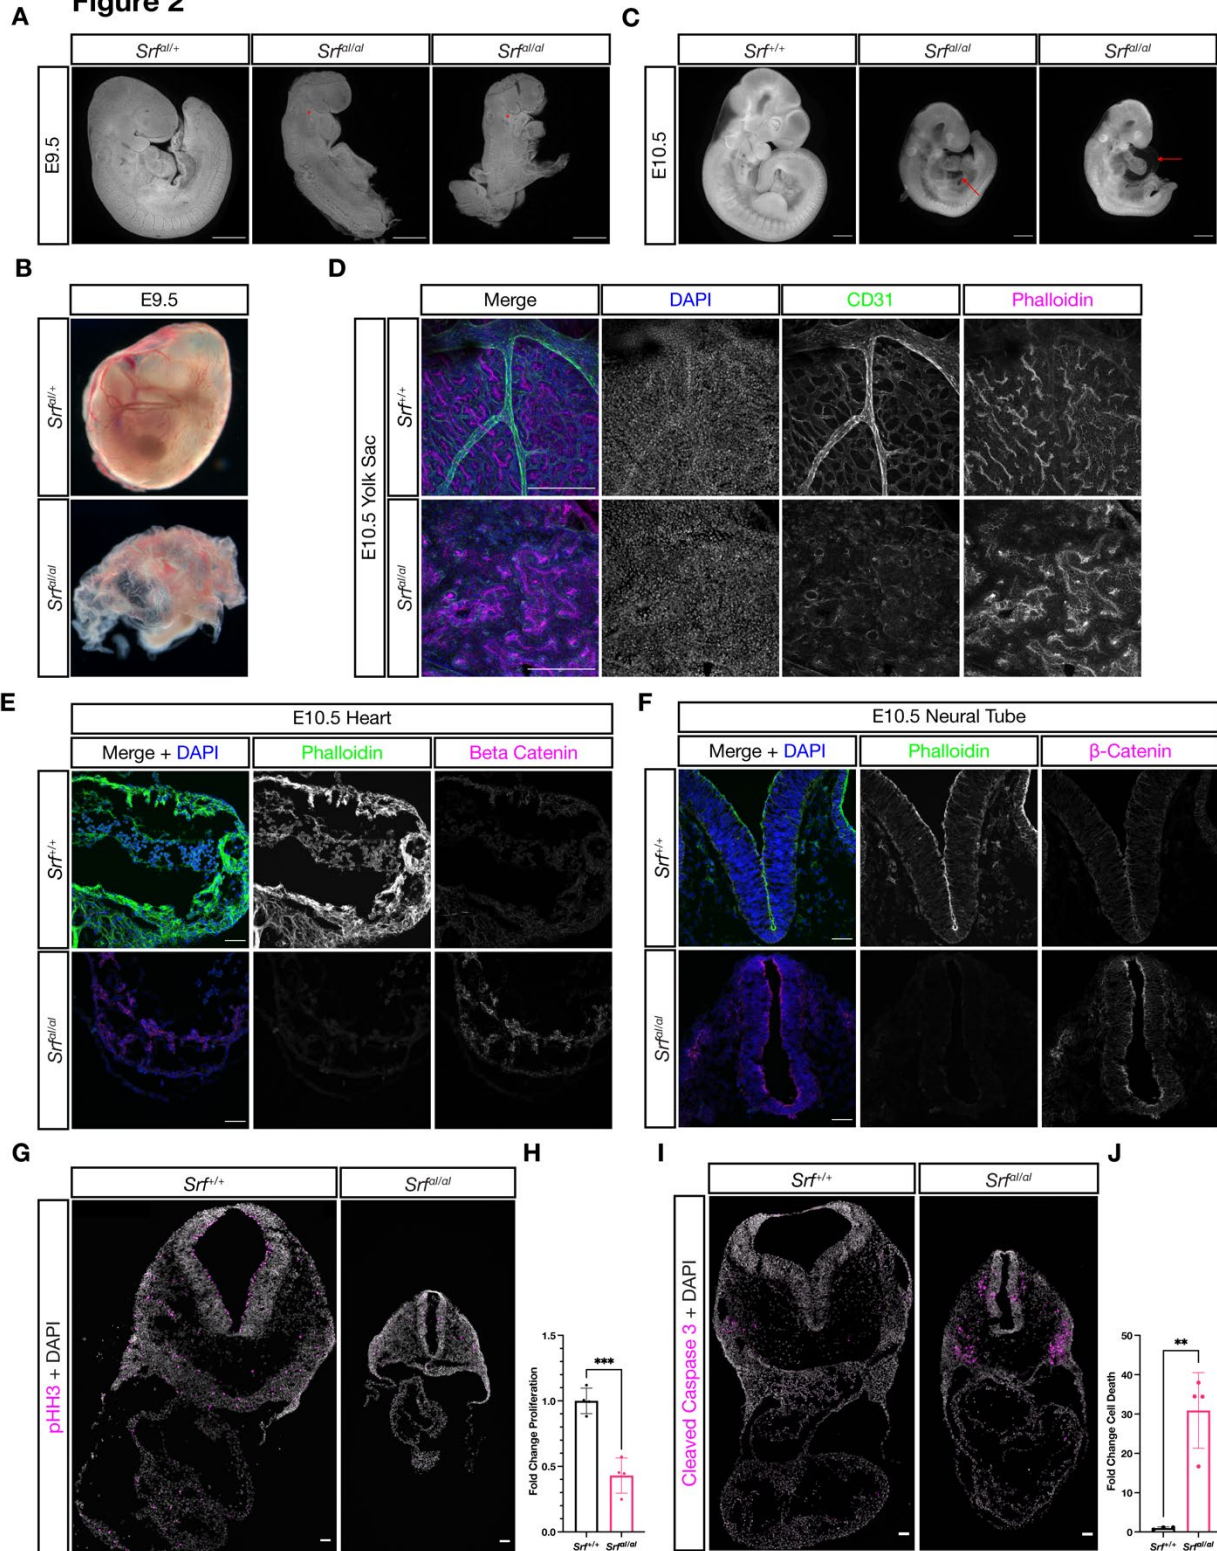

229

230

## Figure 2

### *Srf<sup>al/al</sup> embryos succumb at E10.5 with numerous defects*

(A) DAPI stained E9.5 embryos of the indicated genotypes show that compared to *Srf<sup>al/+</sup>* embryos, *Srf<sup>al/al</sup>* embryos are growth retarded, incompletely turned, have short and disorganized tails, a wavy neural tube, delayed anterior neural tube closure, and a hypoplastic or missing second pharyngeal arch (red asterisk). Scale bar represents 500  $\mu\text{m}$ . (B) Brightfield images of E9.5 yolk sacs indicate defective vasculogenesis in mutant embryos. (C) DAPI stained E10.5 embryos show more extensive growth retardation, a distended heart tube, and pericardial edema (red arrow). Scale bar represents 500  $\mu\text{m}$ . (D) Immunofluorescent staining of E10.5 yolk sacs shows that mutant yolk sacs lack a remodeled vascular plexus or any large vessels. Images are representative of n=4 embryos of each genotype. Scale bar represents 250  $\mu\text{m}$ . (E) Transverse sections through E10.5 embryos at the level of the heart show reduced F-actin intensity via phalloidin staining and increased non-nuclear  $\beta$ -Catenin levels. Images are representative of n=4 embryos of each genotype. Scale bar represents 50  $\mu\text{m}$ . (F) A similar pattern is seen in the neural tube. Scale bar represents 50  $\mu\text{m}$ . (G) Cell proliferation, indicated through phospho-Histone H3 (Ser10) (pHH3) staining, is reduced in mutant embryos. Scale bar represents 50  $\mu\text{m}$ . (H) Quantitation of (G), n=4 each genotype. p=0.0005, Student's unpaired two-tailed t-test. (I) Cell death, revealed through cleaved caspase 3 staining, is dramatically increased in mutant embryos. Scale bar represents 50  $\mu\text{m}$ . (J) Quantitation of (I), n=3 control embryos and n=4 mutant embryos. p=0.003, Student's unpaired two-tailed t-test. Columns are the mean and error bars represent the standard deviation in (H) and (J).

231 By E10.5, the anterior neural tube had closed but other defects remained or became  
232 apparent. Mutant embryos were much smaller than their wild-type or heterozygous  
233 littermates (Figure 2C). The developing heart tube appeared distended and thin, and most  
234 embryos showed pericardial edema (Figure 2C, arrows). The overall length of mutant  
235 embryos was shorter (Figure 2C) and a subset failed to turn, remaining inflected similar  
236 to the rightmost embryo in Figure 2A (data not shown). Whole-mount immunostaining of  
237 the yolk sac with the endothelial marker CD31/PECAM1 revealed that while wild type  
238 littermates had an extensively remodeled capillary plexus, including the presence of  
239 larger vessels, mutant yolk sacs had only a crude primitive capillary plexus, despite the  
240 presence of CD31-positive cells (Figure 2D). A reduction in F-Actin levels throughout  
241 mutant embryos, including the heart (Figure 2E) and neural tube (Figure 2F), was  
242 consistent with reduced SRF-MRTF-mediated transcription of cytoskeletal genes.

243 Interestingly, we noted a concomitant increase in non-nuclear  $\beta$ -Catenin levels (Figure  
244 2E-F). Additionally, mutant embryos showed reduced cell proliferation and significantly  
245 increased cell death (Figure 2G-H).

246

247 While striking, the phenotype of  $Srf^{*\alpha*/\alpha}$  embryos is less severe than that reported for  $Srf$   
248 null mutants, which succumb from E6.5-E8.5 and do not induce expression of the  
249 mesoderm marker  $T$  (Arsenian et al., 1998). We generated homozygous  $Srf^{-/}$  embryos  
250 and found them to be delayed at E6.5 and E7.5 and were not recovered at later stages  
251 (data not shown), verifying the early lethality on our genetic background and thus  
252 confirming the difference in severity between the  $Srf$  and  $Srf^{*\alpha*}$  alleles.

253

254 *The  $Srf$  and  $Srf^{*\alpha*}$  alleles cause similar defects in the anterior mesodermal lineage.* In  
255 order to make a second comparison between the  $Srf^{*\alpha*}$  and  $Srf$  alleles, we generated  
256  $Srf^{flox/flox}; Mesp1^{Cre/+}$  and  $Srf^{*\alpha*/flox}; Mesp1^{Cre/+}$  embryos and assessed them at E9.5 and  
257 E10.5.  $Mesp1-Cre$  directs recombination in anterior mesoderm, including cardiac  
258 mesoderm. This is a tissue where SRF-MRTF interactions are known to be required,  
259 particularly through SRF-Myocardin activity in the developing heart and vascular smooth  
260 muscle (Li et al., 2003; Miano et al., 2004; Niu et al., 2005; Parlakian et al., 2004).

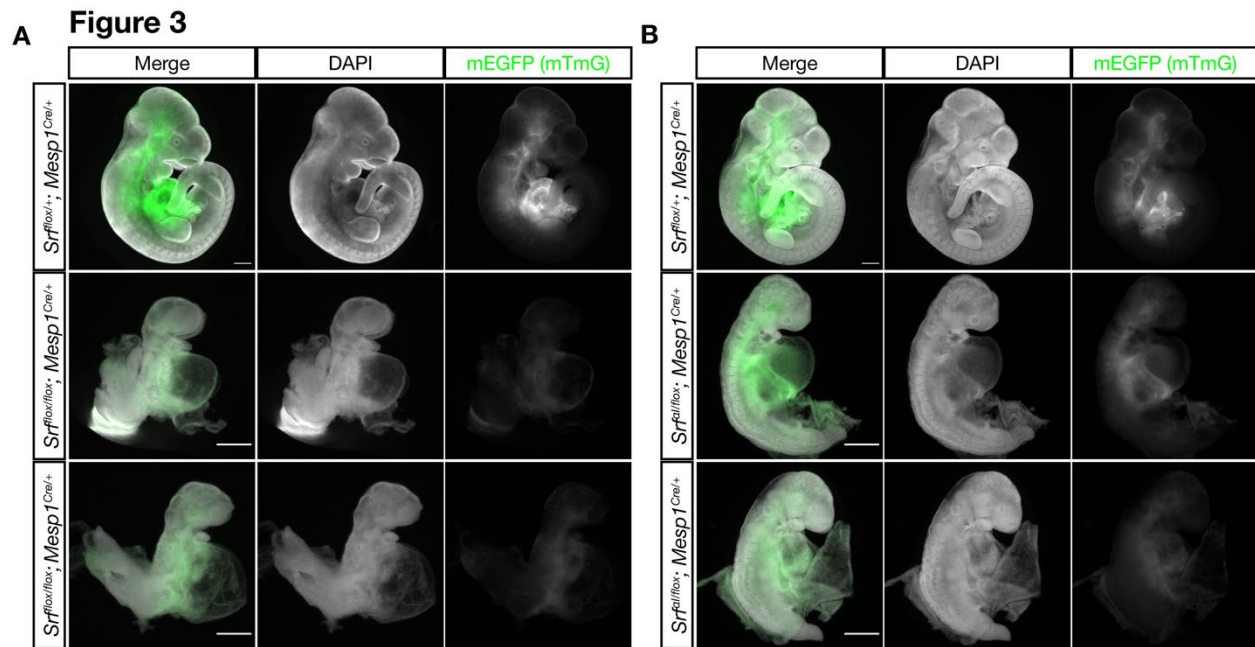

261

**Figure 3**

The  $Srf^{al}$  and  $Srf^{flox}$  alleles exhibits similar defects in anterior mesoderm

(A) E10.5 littermate embryos were stained with DAPI and imaged. Loss of  $Srf$  in the  $Mesp1-Cre$  lineage causes embryos to be undersized with pericardial edema, hypoplastic hearts, and turning defects. Phenotype observed in n=3/3 mutant embryos. (B) A similar experiment in which  $Srf^{al}$  is the only  $Srf$  allele expressed in the  $Mesp1-Cre$  lineage. These embryos appear comparable to the mutant embryos in (A), though they are clearly less severely affected as they are slightly larger and partially turned. Phenotype observed in n=3/3 mutant embryos. Scale bar represents 500  $\mu$ m in all images. Note the 2x higher crop in mutant embryos to better illustrate phenotypes.

262

263 Both  $Srf^{flox/flox}; Mesp1^{Cre/+}$  and  $Srf^{al/flox}; Mesp1^{Cre/+}$  embryos were inviable after E10.5 and  
 264 exhibited similar phenotypes. Mutant embryos were small, had turning defects (or  
 265 arrested prior to or during the turning process), pericardial edema, and hypoplastic hearts.  
 266 They appeared quite similar to  $Srf^{al/al}$  embryos and phenocopied  $Myocd$  mutants (Figure  
 267 3A-B) (Li et al., 2003). Notably, although  $Srf^{al/flox}; Mesp1^{Cre/+}$  and  $Srf^{flox/flox}; Mesp1^{Cre/+}$   
 268 embryos were broadly similar,  $Srf^{flox/flox}; Mesp1^{Cre/+}$  embryos were more strongly affected,  
 269 being reproducibly smaller and completely unturned. Although these embryos were  
 270 generated from separate crosses, precluding direct comparisons, the observations were



271 consistent across multiple litters. We conclude from this analysis that the *Srf<sup>cal</sup>* allele is  
272 less severe than the *Srf* allele, but nevertheless represents a significant curtailment of  
273 SRF activity. Moreover, because *Srf<sup>cal/flox</sup>; Mesp1<sup>Cre/+</sup>* and *Srf<sup>cal/cal</sup>* embryos are so similar,  
274 the *Srf<sup>cal/cal</sup>* phenotype is not a secondary consequence of placental insufficiency, a  
275 common cause of cardiovascular and neural phenotypes (Perez-Garcia et al., 2018), as  
276 *Mesp1<sup>Cre/+</sup>* labels anterior embryonic and extraembryonic (i.e. yolk sac) mesoderm, but  
277 not the trophectoderm-derived placenta (Saga et al., 1999).

278  
279 *Srf<sup>cal/flox</sup>; Wnt1-Cre<sup>Tg/+</sup>* embryos do not display craniofacial defects at E13.5. We next  
280 asked whether *Srf<sup>cal/flox</sup>; Wnt1-Cre<sup>Tg/+</sup>* embryos would display similar defects to *Srf<sup>flox/flox</sup>;*  
281 *Wnt1-Cre<sup>Tg/+</sup>* embryos, as we expected. Surprisingly, these embryos appeared  
282 completely normal at E13.5 (Figure 4A), when *Srf<sup>flox/flox</sup>; Wnt1-Cre<sup>Tg/+</sup>* embryos are already  
283 dying and display obvious craniofacial abnormalities.

284  
285 We tested whether the *Srf<sup>cal</sup>* allele was behaving as expected in the NC lineage using  
286 MEPM cells cultured from E13.5 *Srf<sup>cal/flox</sup>; Wnt1-Cre<sup>Tg/+</sup>; ROSA26<sup>TdT/+</sup>* (mutant) and *Srf<sup>flox/+</sup>;*  
287 *Wnt1-Cre<sup>Tg/+</sup>; ROSA26<sup>TdT/+</sup>* (control) palatal shelves (Figure 4B). We assessed the  
288 expression of genes preferentially regulated by SRF-TCF activity, such as the IEGs, and  
289 those regulated by SRF-MRTF activity, namely cytoskeletal genes. At the protein level,  
290 immunofluorescent staining of MEPM cells for F-actin and smooth muscle actin (SMA)  
291 showed reduced intensity in mutant cell lines compared to control lines (Figure 4C). We  
292 also assessed gene expression at the mRNA level by qPCR in starved and serum-  
293 stimulated lines. While we noted no significant changes in the expression of the IEGs

294 *Egr1* and *Fos* (Figure 4D), levels of *Tagln* (SM22) and *Acta2* (the gene encoding SMA)  
295 were significantly downregulated in both conditions, and we noted a downward trend in  
296 *Vcl* expression (Figure 4D). *Srf* itself was also significantly downregulated, likely due to  
297 autoregulation via the several CArG elements at the *Srf* locus (Figure 4D, Figure 2  
298 Supplement 1A). We confirmed that MRTF-A translocated to the nucleus in response to  
299 serum in control and mutant cell lines (Figure 4 Supplement 1A-B).

**Figure 4**

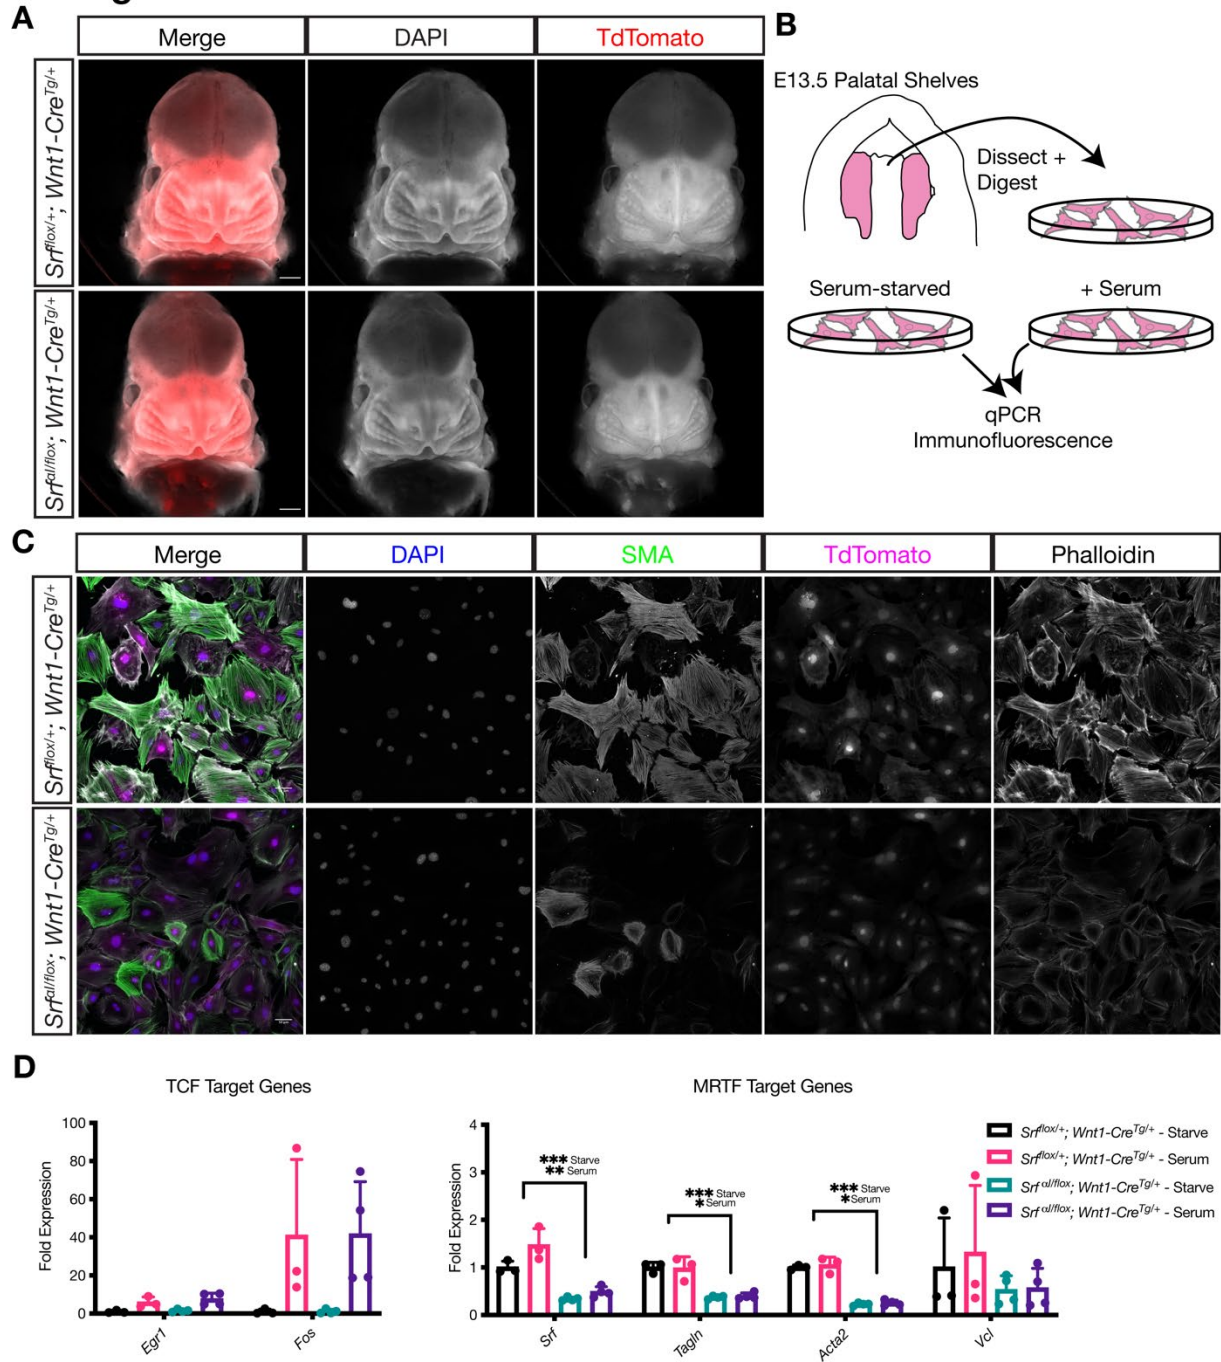

300



#### Figure 4

##### NC $Srf^{fl}$ conditional mutants are normal at E13.5

(A) DAPI stained E13.5 littermate embryos carrying a  $ROSA26^{TdT/+}$  Cre reporter show no apparent craniofacial defects in conditional mutants. Scale bar represents 500  $\mu\text{m}$ . (B) Diagram illustrating the culture of MEPM cells. (C) Immunofluorescent staining of passage 2 MEPM cells shows reduced F-actin and SMA fluorescence in mutant cells compared to cells from heterozygous littermate control embryos. Scale bar represents 50  $\mu\text{m}$ . (D) qPCR from serum-starved and serum-stimulated MEPM cells indicates no difference in IEG expression ( $Egr1$ ,  $Fos$ ) but a significant defect in  $Srf$  ( $q=0.00042$  starve,  $q=0.0095$  serum),  $Tagln$  ( $q=0.00038$  starve,  $q=0.013$  serum), and  $Acta2$  ( $q=0.000011$  starve,  $q=0.0027$  serum) expression and a downward trend in  $Vcl$  expression. Values are fold expression of control starved cells.  $N=3$  control lines and  $n=4$  mutant lines. Significance was determined by Student's unpaired t-test with two-stage step-up correction (Benjamini, Krieger, and Yekutieli) for multiple comparisons. Columns are the mean and error bars represent the standard deviation.

301 Because  $Srf$  interacts genetically with  $Pdgfra$  in the NC and because SRF-MRTF  
302 transcriptional targets were suggested to be of particular importance downstream of  
303 PDGFRA signaling, we reasoned that the  $Srf^{fl}$  allele might also interact genetically with  
304  $Pdgfra$  in this tissue (Vasudevan & Soriano, 2014). To test this possibility, we generated  
305  $Srf^{fl/+}; Pdgfra^{H2B-EGFP/+}; Wnt1-Cre^{Tg/+}$  triple heterozygous male mice and crossed them  
306 with  $Srf^{fl/fl}; ROSA26^{TdT/TdT}$  mice but did not observe facial clefting in embryos of any  
307 genotype (data not shown).

308

309 In summary, cells from  $Srf^{fl/fl}; Wnt1-Cre^{Tg/+}$  embryos show the expected changes in  
310 gene expression, yet the embryos themselves show no outward signs of the severe  
311 craniofacial phenotypes observed in  $Srf^{fl/fl}; Wnt1-Cre^{Tg/+}$  embryos at this stage.

## Figure 4 Supplement 1

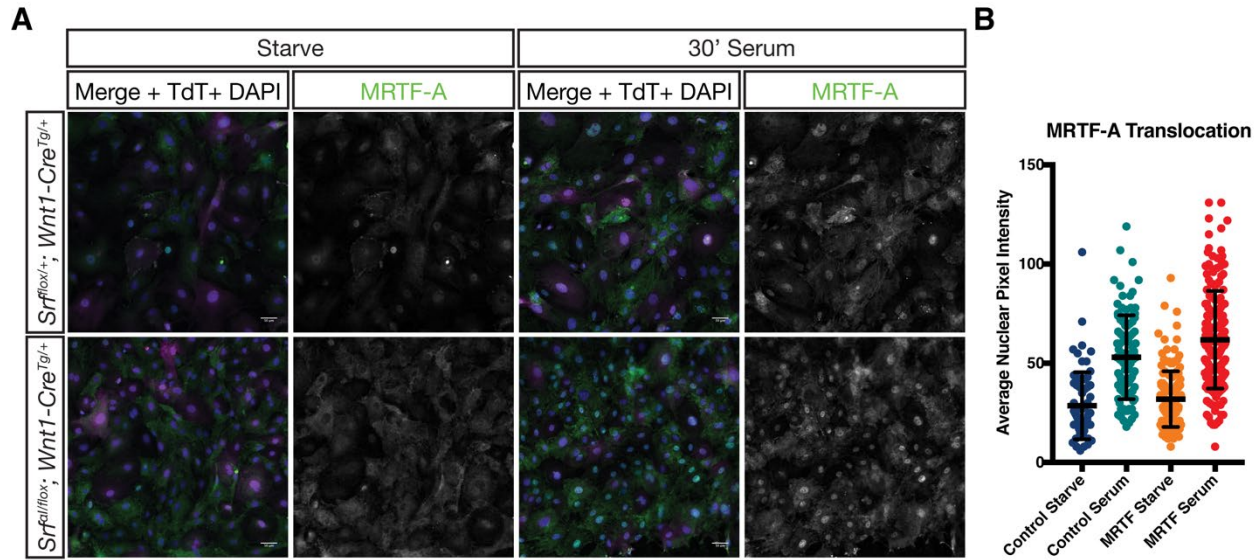

312

### Figure 4 Supplement 1

*MRTF-A translocates to the nucleus normally in response to serum stimulation in mutant MEPM cells*

(A) Serum starved or stimulated P2 primary MEPM cells from  $Srf^{flox/+}; Wnt1-Cre^{Tg/+}; ROSA26^{TdT/+}$  (mutant) and  $Srf^{flox/+}; Wnt1-Cre^{Tg/+}; ROSA26^{TdT/+}$  (control) embryos were stained for MRTF-A and DAPI. (B) Nuclear MRTF-A levels were quantified using the DAPI channel to identify nuclei. Dots represent individual cells pooled from n=2 unique cell lines for each genotype. Horizontal bars are the mean and error bars represent the standard deviation.

313

314  $Srf^{flox/+}; Wnt1-Cre^{Tg/+}$  mice succumb in the early postnatal period with outflow tract

315 defects.  $Srf^{flox/+}; Wnt1-Cre^{Tg/+}$  embryos survived until birth, after which they died within

316 the first two days of life with visible cyanosis (Figure 5A). We examined E18.5 skeletal

317 preparations for defects in patterning or ossification that may arise after E13.5. Mutant

318 skulls were smaller than in control littermates, but the craniofacial skeleton was patterned

319 normally indicating a developmental delay at this timepoint (Figure 5 Supplement 1). To

320 determine the underlying cause of cyanosis, we examined the cardiac outflow tract at P0

321 as the smooth muscle in this region is NC-derived and responsible for proper remodeling

322 of the aortic arch vessels during development. We found a highly penetrant (9/14) patent  
323 ductus arteriosus (PDA) exclusively in *Srf<sup>α1/flox</sup>; Wnt1-Cre<sup>Tg/+</sup>* neonates (Figure 5B-C). In  
324 this condition, the embryonic shunt from the pulmonary artery to the aorta, the ductus  
325 arteriosus, fails to close after birth, making circulation to the lungs inefficient and likely  
326 explaining the postnatal cyanosis. We also noted one instance of aberrant right  
327 subclavian artery, in which the right subclavian artery originates from the descending  
328 aorta instead of the brachiocephalic artery, which only supplies the right common carotid  
329 artery in this condition. We also inspected P0 mice from a similar cross on a *Pdgfra<sup>H2B-</sup>*  
330 *EGFP/+* background to assess whether heterozygosity for *Pdgfra* would exacerbate  
331 phenotypes at this stage, but neonates were recovered in the expected Mendelian ratios  
332 with similar outflow tract defects (Figure 5 Supplement 2A-B). Two *Srf<sup>α1/flox</sup>; Wnt1-Cre<sup>Tg/+</sup>; Pdgfra<sup>+/+</sup>*  
333 *Pdgfra<sup>+/+</sup>* from this set of crosses displayed a more severe outflow tract defect: right aortic  
334 arch with mirror image branching (2/9; Figure 5C, far right).

## A Figure 5

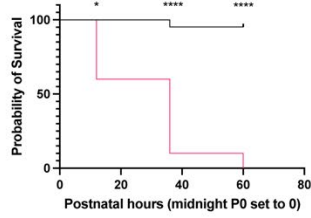

## B

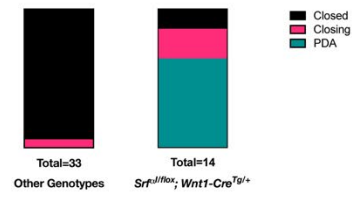

## C

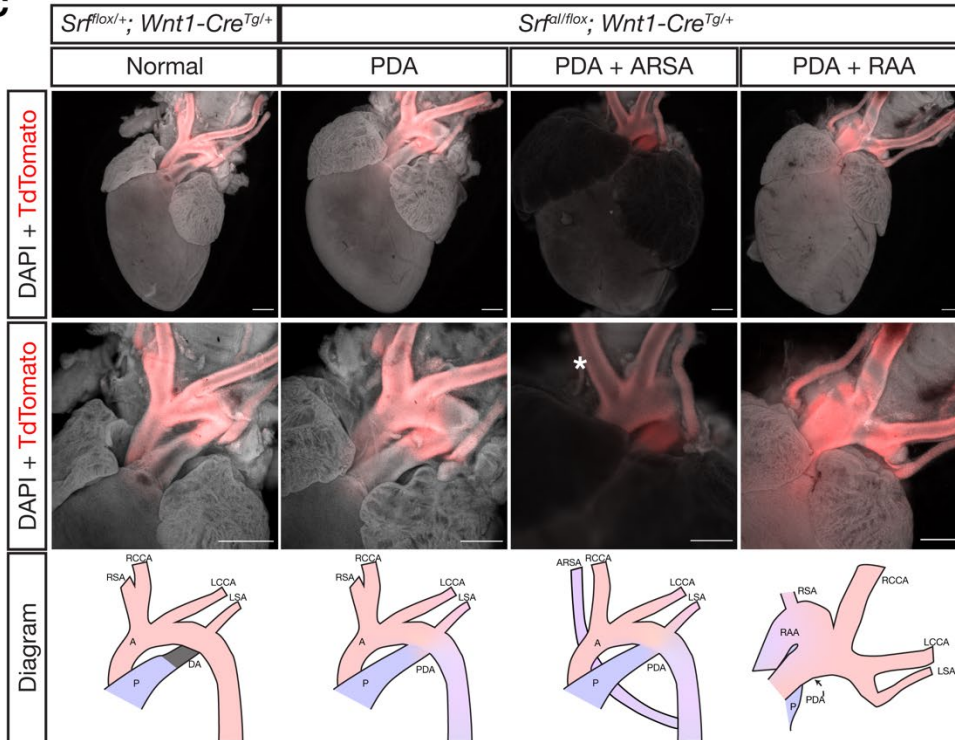

## D

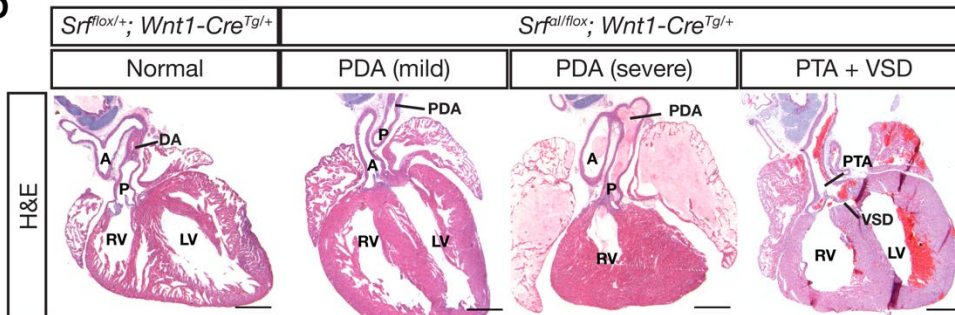

## E

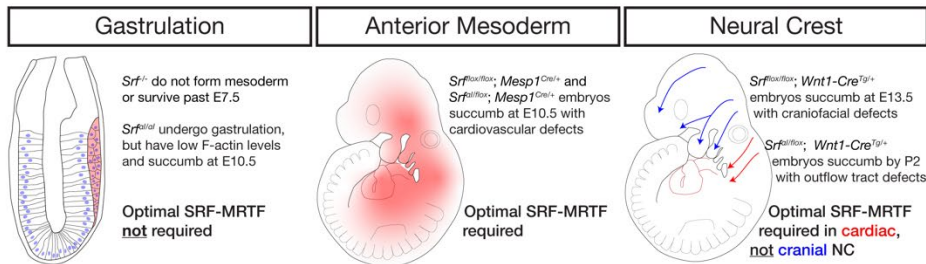

## Figure 5

### *NC Srf<sup>αl</sup> conditional mutants succumb postnatally with outflow tract defects*

(A) Kaplan-Meyer survival curve for neonatal *Srf<sup>αl/flox</sup>; Wnt1-Cre<sup>Tg/+</sup>* (Mutant) compared to littermates of all other genotypes (Control). Significance was computed at each timepoint using a Mantel-Cox log-rank test. P0 p=0.0142, P1 p<0.0001, P2 p<0.0001. (B) Stacked columns showing the distribution of PDA-related phenotypes in *Srf<sup>αl/flox</sup>; Wnt1-Cre<sup>Tg/+</sup>* neonates compared to littermates of all other genotypes. (C) DAPI-stained postnatal day 0 (P0) hearts carrying a *ROSA26<sup>Tdt/+</sup>* Cre lineage reporter showing the entire heart (top row) and the outflow tract region (bottom row). Examples of mutant phenotypes such as PDA, ARSA, and RAA. An asterisk indicates where the missing right subclavian artery should be. Note the ARSA mouse had succumbed prior to dissection and the image is dimmer due to the presence of clotted blood. The outflow tract defects are schematized below. Scale bar represents 500 μm. (D) Hematoxylin and eosin-stained frontal sections through P0 hearts showing mild to severe PDA and an example of VSD and PTA in mutants. Scale bar represents 500 μm. (E) Summary of our results, showing the requirements for SRF versus SRF<sup>αl</sup> in different tissues and timepoints. A, aorta; ARSA, aberrant right subclavian artery; DA, ductus arteriosus; LCA, left common carotid artery; LSA, left subclavian artery; LV, left ventricle; P, pulmonary artery; PDA, patent ductus arteriosus; PTA, persistent truncus arteriosus; RAA, right aortic arch with mirror image branching; RCA, right common carotid artery; RSA, right subclavian artery.

336 Sections through *Srf<sup>αl/flox</sup>; Wnt1-Cre<sup>Tg/+</sup>* and control *Srf<sup>flox/+</sup>; Wnt1-Cre<sup>Tg/+</sup>* hearts confirmed  
337 the macroscopically observed PDAs and also revealed one instance of ventricular septal  
338 defect (VSD) with persistent truncus arteriosus (PTA), a failure of the truncus arteriosus  
339 to fully septate into the aorta and pulmonary artery, out of ten mutant hearts examined  
340 (Figure 5D). Mutant embryos that survived the first several hours of life had a milk spot,  
341 indicating they did not have pronounced defects in olfaction or the craniofacial bones,  
342 nerves, and muscles required for suckling. Thus, while the *Srf<sup>αl</sup>* allele is surprisingly well-  
343 tolerated in the cranial NC lineage throughout most of development, it is required in the  
344 cardiac NC-derived smooth muscle of the cardiac outflow tract to support postnatal life,  
345 highlighting a critical role for SRF-MRTF interactions in this particular NC lineage (Figure  
346 5E).  
347



## Figure 5 Supplement 1

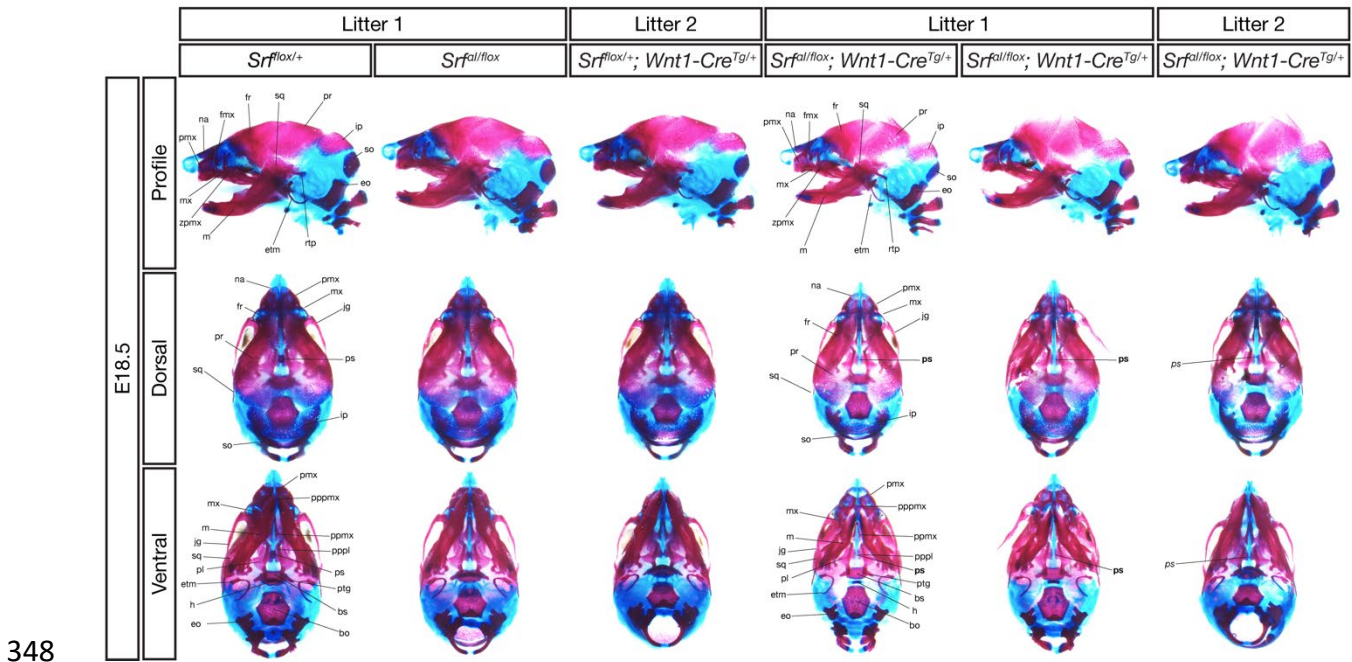

### Figure 5 Supplement 1

#### *E18.5 conditional mutant skulls are delayed but correctly patterned*

Alizarin red (bone) and alcian blue (cartilage) stained E18.5 skulls of the indicated genotypes from two litters are shown. All three conditional mutant embryos were smaller than their control littermates and had less extensive ossification. However, all the indicated bones were present in each genotype, except for the presphenoid bone, which was missing in 2/3 mutants (location of missing bone indicated in bold) and rudimentary in one (italics). Bo, basioccipital; bs, basisphenoid; eo, exoccipital; etm, ectotympanic; fmx, frontal process of maxilla; fr, frontal; h, hyoid; ip, interparietal; jg, jugal; m, mandible; mx, maxilla; na, nasal; pl, palatine; pmx, premaxilla; ppmx, palatal process of maxilla; pppl, palatal process of palatine; pppmx, palatal process of premaxilla; pr, parietal; ps, presphenoid; ptg, pterygoid; rtp, retrotympenic process; so, supraoccipital; sq, squamosal; zpmx, zygomatic process of maxilla.

349

350

## Figure 5 Supplement 2

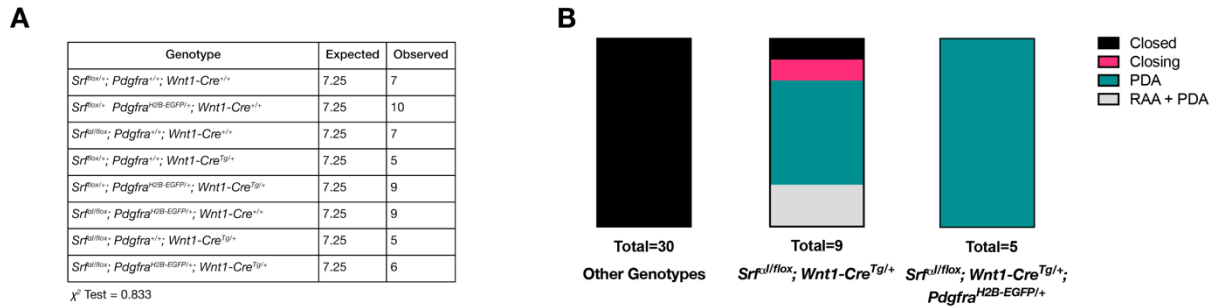

351

### Figure 5 Supplement 2

*Pdgfra* and *Srf*<sup>α1</sup> do not interact genetically in NC

(A) Expected and recovered numbers of embryos of each genotype at birth (P0). No significant deviation from Mendelian ratios was observed. (B) PDA-related phenotypes in  $Srf^{flox/flox}; Wnt1-Cre^{Tg/+}$  neonates are not exacerbated by the loss of one copy of *Pdgfra*.

352

### 353 Discussion

354 SRF is a ubiquitously expressed transcription factor whose transcriptional output is  
 355 strongly influenced by its cofactors, the TCFs and MRTFs. These cofactors, in turn, are  
 356 regulated both by specific expression patterns (e.g. *Myocd* specifically in muscle) and by  
 357 signaling pathways, such as ERK1/2 and PI3K (Posern & Treisman, 2006) (Figure 1A).  
 358 We sought to better understand the relationship between SRF, its cofactors, and mutant  
 359 phenotypes in both a general and a tissue-specific manner.

360

361 Our previous study demonstrated a requirement for *Srf* in the NC lineage (Vasudevan &  
 362 Soriano, 2014), so we first investigated how loss of SRF in this tissue affected gene  
 363 expression. We found normal early NC patterning but misexpression of cytoskeleton-  
 364 related genes in  $Srf^{flox/flox}; Wnt1-Cre^{Tg/+}$  embryos (Figure 1C-F, Figure 1 Supplement 1,  
 365 2E). Comparing the DEGs with known SRF and cofactor targets showed particular

366 enrichment for MRTF targets in our datasets (Figure 1G-H, Figure 1 Supplement 2F-G),  
367 consistent with SRF's well-known function regulating cytoskeletal genes and the  
368 dominant role of MRTF cofactors in the serum response (Esnault et al., 2014). To test the  
369 supposition that SRF-MRTF activity would be the main driver of NC SRF activity, we made  
370 a new *Srf<sup>Δ1</sup>* mouse model harboring point mutations that specifically disrupt SRF-MRTF-  
371 DNA complex formation (Zaromytidou et al., 2006).

372

373 Homozygous *Srf<sup>Δ1/Δ1</sup>* embryos died at E10.5 with defects in the yolk sac vasculature, heart,  
374 and neural tube and exhibited reduced F-actin levels (Figure 2A-F). Both the timing of  
375 lethality and gross appearance of the embryos strongly resemble *Myocd<sup>-/-</sup>* mutant mice  
376 (Li et al., 2003). The phenotype is much less severe than *Srf<sup>-/-</sup>* embryos, however, which  
377 die around E7.5 and fail to induce mesoderm (Arsenian et al., 1998; Niu et al., 2005).  
378 Expression of the *Srf<sup>Δ1</sup>* allele specifically in the *Mesp1<sup>Cre</sup>* mesodermal lineage also  
379 resulted in lethality at E10.5 and defects almost as severe as complete loss of *Srf* in this  
380 same lineage (Figure 3). The similarity of the two alleles in the *Mesp1<sup>Cre</sup>* lineage  
381 compared against their strikingly different phenotypes in gastrula-stage embryos  
382 suggested there may be time or tissue specific requirements for SRF-MRTF activity.

383

384 We went on to test the *Srf<sup>Δ1</sup>* allele in the NC lineage, where we presumed it would be  
385 critically important. Similar to the early embryo, expression of the *Srf<sup>Δ1</sup>* allele was well  
386 tolerated in NC and we found no facial cleft or bleb in our *Srf<sup>Δ1/flox</sup>; Wnt1-Cre<sup>Tg/+</sup>* mice, as  
387 in *Srf<sup>flox/flox</sup>; Wnt1-Cre<sup>Tg/+</sup>* mice (Figure 4A). The allele also failed to interact genetically  
388 with *Pdgfra* in this lineage, suggesting PDGF signaling may rely on MRTF-independent



389 SRF activity (Figure 5 Supplement 2A-B). Nevertheless, this mutation in NC does have a  
390 profound developmental effect as *Srf<sup>lox/flox</sup>; Wnt1-Cre<sup>Tg/+</sup>* mice completed gestation but  
391 died by postnatal day 2 with visible cyanosis (Figure 5A). Examination of the cardiac  
392 outflow tract revealed numerous defects including PDA, right aortic arch, and one  
393 instance of VSD with PTA (Figure 5C-D). This result is reminiscent of mice with a  
394 hypomorphic gene trap mutation in *Mrtfb* and mice carrying a conditional deletion of  
395 *Myocd* in the NC (Huang et al., 2008; J. Li et al., 2005), both of which result in early  
396 postnatal lethality due to defects in outflow tract development. Similarly, NC conditional  
397 *Srf* mutants on a genetic background that permitted later development exhibit outflow  
398 tract defects at E16.5 (Newbern et al., 2008). These studies and our own results together  
399 highlight a critical role for SRF-MRTF interactions in cardiac NC development. A summary  
400 of the tissue-specific sensitivities we found to loss of *Srf* or *Srf<sup>lox</sup>* expression is depicted in  
401 Figure 5E.

402

403 We considered three possible explanations for the tolerance of the *Srf<sup>lox</sup>* allele in NC and  
404 early embryo, which are not mutually exclusive. The first is that TCF factors play a more  
405 important role than previously thought or can somehow compensate for loss of SRF-  
406 MRTF activity. It is true that some SRF targets can be bound and regulated by both MRTF  
407 and TCF factors (Esnault et al., 2014). However, most studies to date indicate that MRTFs  
408 and TCFs not only compete for a common binding site on SRF, but mediate distinct and  
409 opposing phenotypic outcomes, contractility and proliferation, respectively (Gualdrini et  
410 al., 2016; Wang et al., 2004). Furthermore, TCF triple mutant embryos survive until E14.5  
411 without obvious morphological defects (Costello et al., 2010). While we cannot rule out

412 the possibility that TCFs are the primary SRF cofactors in neural crest or function  
413 redundantly to MRTFs without further genetic experiments, this explanation is difficult to  
414 reconcile with the existing literature.

415

416 A second explanation is that non-muscle lineages may be able to function with minimal,  
417 but not zero, SRF-MRTF activity. It is possible that the *Srf<sup>αI</sup>* allele substantially impairs  
418 but not does eliminate SRF-MRTF-DNA complex formation and functions as a hypomorph  
419 in this respect. Biochemical assays for SRF-MRTF-DNA complex formation and single  
420 molecule imaging of SRF using this allele indicate a substantial disruption of SRF-MRTF  
421 activity, but 5-10% residual complex formation remained in the original description of the  
422 αI helix mutations (Hipp et al., 2019; Zaromytidou et al., 2006). On one hand, our own  
423 data demonstrate that homozygous *Srf<sup>αI/αI</sup>* embryos grossly phenocopy *Myocd<sup>-/-</sup>* mutants  
424 (Figure 2) and *Srf<sup>αI/flox</sup>; Mesp1-Cre<sup>Tg/+</sup>* and *Srf<sup>flox/flox</sup>; Mesp1-Cre<sup>Tg/+</sup>* embryos were similar,  
425 though not identical (Li et al., 2003). On the other hand, double conditional mutants for  
426 *Mrtfa/Mrtfb* largely do phenocopy *Srf* conditional mutants in several tissues (Cenik et al.,  
427 2016; Guo et al., 2018; S. Li et al., 2005; Trembley et al., 2015). Therefore, we may be  
428 observing differing dosage requirements for SRF-MRTF activity in distinct tissues. Muscle  
429 lineages, such as cardiovascular cells affected by *Mesp1<sup>Cre</sup>* and outflow tract smooth  
430 muscle affected by *Wnt1-Cre*, may need optimal SRF-MRTF output and are therefore  
431 strongly affected by the *Srf<sup>αI</sup>* allele. Non-muscle lineages such as the cranial NC may  
432 survive and develop properly with only residual SRF-MRTF transcription. Two predictions  
433 of this model are that conditional ablation of *Mrtfa/Mrtfb* in NC would phenocopy loss of  
434 *Srf* and conversely that non-muscle lineages where conditional ablation of *Mrtfa/Mrtfb*

435 yields *Srf*-like phenotypes, such as podocytes and epicardium, would be indifferent to the  
436 *Srf<sup>ed</sup>* mutations.

437

438 The issue of SRF tissue-specific dosage effects may have relevance to human disease.  
439 A recent study performed targeting sequencing of *SRF* in nonsyndromic conotruncal heart  
440 defect patients and identified two novel mutations with reduced transcriptional output, one  
441 from a patient with VSD and the other with Tetralogy of Fallot with right aortic arch  
442 (Mengmeng et al., 2020). Thus, tuning of SRF output may modulate disease in a tissue-  
443 specific manner. Along these lines, mutations in *MYOCD* cause congenital megabladder  
444 and associated cardiovascular phenotypes such as PTA and VSD in humans, but  
445 monoallelic mutations affect only males whereas biallelic mutations affect both sexes  
446 (Houweling et al., 2019). Furthermore, heterozygosity for *FLNA*, a gene we found strongly  
447 affected by loss of *Srf* in mouse NC, causes the human disease Periventricular  
448 Heterotopia I and affected females present with PDA, whereas hemizygous males die  
449 during gestation (Fox et al., 1998). Intriguingly, NC-specific conditional knockout of *Flna*  
450 causes perinatal lethality with outflow tract defects in mice (Feng et al., 2006). It would be  
451 interesting to further explore the notion of tissue-specific thresholds for SRF-cofactor  
452 complexes in future studies.

453

454 A third explanation is that SRF functions with additional factors that regulate gene  
455 expression independent of or redundantly with MRTFs (and/or TCFs). Although MRTFs  
456 and TCFs are the most well-studied SRF cofactors, many other TFs have been shown to  
457 interact with SRF, including but not limited to Homeodomain proteins (Chen et al., 1996;

458 Chen et al., 2002; Grueneberg et al., 1992; Shin et al., 2002), GATA factors (Belaguli et  
459 al., 2000; Morin et al., 2001), and Forkhead-family transcription factors (Freddie et al.,  
460 2007; Liu et al., 2005), as well as the Initiator-binding protein TFII-I (Grueneberg et al.,  
461 1997; Kim et al., 1998). Many of these studies were performed in muscle cells and it is  
462 unclear which cofactors might act independently of MRTFs. However, several of these  
463 genes or their orthologues are expressed in the cranial NC at E10.5 and E11.5, when  
464 cleft formation begins in *Srf<sup>flox/flox</sup>; Wnt1-Cre<sup>Tg/+</sup>* embryos (Minoux et al., 2017). One  
465 candidate is the homeodomain protein PRRX1/PHOX1/MHOX, which was shown to form  
466 complexes with SRF mediated by TFII-I (Grueneberg et al., 1997). Double mutants for  
467 *Prrx1* and its orthologue *Prrx2* have defects of the craniofacial skeleton, aortic arch  
468 arteries, and ductus arteriosus (Bergwerff et al., 2000; Lu et al., 1999). *Gtf2i* mutants (the  
469 gene encoding TFII-I) rarely survive past E10.5 but can exhibit a facial cleft,  
470 hemorrhaging, and hypoplastic pharyngeal arches (Enkmandakh et al., 2009). Whether  
471 SRF mediates transcription independent of MRTFs and TCFs, perhaps using additional  
472 tissue-specific cofactors, would be exciting to determine.

473

474 In conclusion, we found that the primary transcriptional consequence of losing *Srf* in NC  
475 was a defect in actin cytoskeleton-related gene expression. Using a novel *Srf<sup>col</sup>* allele to  
476 perturb SRF's interactions with MRTFs, the primary cofactors regulating the cytoskeletal  
477 transcription program, we uncovered a crucial role for SRF-MRTF activity in the cardiac  
478 NC, but surprisingly found the mutation well-tolerated in the cranial NC. Further study will  
479 be necessary to determine the relevant SRF-cofactor ensembles in different  
480 developmental contexts.

481 **Author Contributions**

482 C.J.D. and P.S. designed the study. P.S. performed blastocyst injections and embryo  
483 transfers. P.S. and C.J.D. performed gene targeting and Southern blotting. C.J.D. carried  
484 out all the remaining experiments, data analysis, and figure preparation. C.J.D. and P.S.  
485 wrote the manuscript.

486

487 **Acknowledgements**

488 We thank the members of the Soriano lab, Robert Krauss, Sergei Sokol, and Harish  
489 Vasudevan for critical reading of the manuscript. We are appreciative of Kevin Kelley and  
490 the Mouse Transgenic Core for stable tissue culture facilities. We thank the Mt. Sinai  
491 Microscopy core facility for consistent advice and top-notch instrumentation. C.J.D. was  
492 supported by F32 DE026678 from National Institutes of Health (NIH)/National Institute of  
493 Dental and Craniofacial Research (NIDCR). This work was supported by R01 DE022363  
494 from NIH/NIDCR to P.S.

495

496 **Competing Interest Statement**

497 The authors declare no financial or non-financial competing interests.

498

499 **Figure 1**

500 *Loss of Srf in NC affects cytoskeletal gene expression*

501 (A) Diagram depicting SRF, its TCF and MRTF cofactors, and the upstream signals that  
502 regulate them. (B) DAPI stained embryos at E11.5 and E12.5 show a facial cleft following  
503 loss of *Srf* in NC. Scale bar represents 1mm. (C) Diagram depicting RNA-sequencing  
504 strategy. (D) Volcano plot showing DEGs in *Srf* NC conditional mutants. Genes with a p  
505 value  $< 0.01$  and  $\log_2$  fold change (FC)  $> 0.25$  are colored. Select genes are labeled. (E)  
506 A heatmap of the top 25 DEGs by q value. The samples cluster by genotype and are  
507 color-coded by Z-score. (F) Gene set enrichment analysis (GSEA) using a list of DEGs  
508 with  $q \leq 0.05$  and  $\text{Log}_2\text{FC} \leq -0.25$ . Enrichment for ENCODE TF ChIP-Seq, GO Cellular  
509 Component, and GO Biological Process are shown. (G) GSEA for known SRF, MRTF,  
510 and TCF ChIP targets from previous datasets (Esnault et al., 2014; Gualdrini et al., 2016)  
511 across our entire dataset. (H) Overlap of known MRTF and TCF targets with DEGs  $q \leq$   
512 0.05. (I) Absolute value of  $\log_2$  FC for DEGs that overlap with each category. Horizontal  
513 bar indicates the mean (0.385 Shared, 0.378 MRTF, 0.219 TCF).

514

515 **Figure 2**

516 *Srf<sup>α/α</sup> embryos succumb at E10.5 with numerous defects*

517 (A) DAPI stained E9.5 embryos of the indicated genotypes show that compared to *Srf<sup>α/+</sup>*  
518 embryos, *Srf<sup>α/α</sup>* embryos are growth retarded, incompletely turned, have short and  
519 disorganized tails, a wavy neural tube, delayed anterior neural tube closure, and a  
520 hypoplastic or missing second pharyngeal arch (red asterisk). Scale bar represents 500  
521  $\mu\text{m}$ . (B) Brightfield images of E9.5 yolk sacs indicate defective vasculogenesis in mutant

522 embryos. (C) DAPI stained E10.5 embryos show more extensive growth retardation, a  
523 distended heart tube, and pericardial edema (red arrow). Scale bar represents 500  $\mu\text{m}$ .  
524 (D) Immunofluorescent staining of E10.5 yolk sacs shows that mutant yolk sacs lack a  
525 remodeled vascular plexus or any large vessels. Images are representative of n=4  
526 embryos of each genotype. Scale bar represents 250  $\mu\text{m}$ . (E) Transverse sections  
527 through E10.5 embryos at the level of the heart show reduced F-actin intensity via  
528 phalloidin staining and increased non-nuclear  $\beta$ -Catenin levels. Images are  
529 representative of n=4 embryos of each genotype. Scale bar represents 50  $\mu\text{m}$ . (F) A  
530 similar pattern is seen in the neural tube. Scale bar represents 50  $\mu\text{m}$ . (G) Cell  
531 proliferation, indicated through phospho-Histone H3 (Ser10) (pHH3) staining, is reduced  
532 in mutant embryos. Scale bar represents 50  $\mu\text{m}$ . (H) Quantitation of (G), n=4 each  
533 genotype. p=0.0005, Student's unpaired two-tailed t-test. (I) Cell death, revealed through  
534 cleaved caspase 3 staining, is dramatically increased in mutant embryos. Scale bar  
535 represents 50  $\mu\text{m}$ . (J) Quantitation of (I), n=3 control embryos and n=4 mutant embryos.  
536 p=0.003, Student's unpaired two-tailed t-test. Columns are the mean and error bars  
537 represent the standard deviation in (H) and (J).

538

### 539 **Figure 3**

540 *The  $Srf^{u.l}$  and  $Srf^{flox}$  alleles exhibits similar defects in anterior mesoderm*

541 (A) E10.5 littermate embryos were stained with DAPI and imaged. Loss of *Srf* in the  
542 *Mesp1-Cre* lineage causes embryos to be undersized with pericardial edema, hypoplastic  
543 hearts, and turning defects. Phenotype observed in n=3/3 mutant embryos. (B) A similar  
544 experiment in which *Srf<sup>ex1</sup>* is the only *Srf* allele expressed in the *Mesp1-Cre* lineage. These

545 embryos appear comparable to the mutant embryos in (A), though they are clearly less  
546 severely affected as they are slightly larger and partially turned. Phenotype observed in  
547 n=3/3 mutant embryos. Scale bar represents 500  $\mu\text{m}$  in all images. Note the 2x higher  
548 crop in mutant embryos to better illustrate phenotypes.

549

#### 550 **Figure 4**

551 *NC Srf<sup>al</sup> conditional mutants are normal at E13.5*

552 (A) DAPI stained E13.5 littermate embryos carrying a *ROSA26<sup>TdT/+</sup>* Cre reporter show no  
553 apparent craniofacial defects in conditional mutants. Scale bar represents 500  $\mu\text{m}$ . (B)  
554 Diagram illustrating the culture of MEPM cells. (C) Immunofluorescent staining of  
555 passage 2 MEPM cells shows reduced F-actin and SMA fluorescence in mutant cells  
556 compared to cells from heterozygous littermate control embryos. Scale bar represents 50  
557  $\mu\text{m}$ . (D) qPCR from serum-starved and serum-stimulated MEPM cells indicates no  
558 difference in IEG expression (*Egr1*, *Fos*) but a significant defect in *Srf* ( $q=0.00042$  starve,  
559  $q=0.0095$  serum), *Tagln* ( $q=0.00038$  starve,  $q=0.013$  serum), and *Acta2* ( $q=0.000011$   
560 starve,  $q=0.0027$  serum) expression and a downward trend in *Vcl* expression. Values are  
561 fold expression of control starved cells. N=3 control lines and n=4 mutant lines.  
562 Significance was determined by Student's unpaired t-test with two-stage step-up  
563 correction (Benjamini, Krieger, and Yekutieli) for multiple comparisons. Columns are the  
564 mean and error bars represent the standard deviation.

565

#### 566 **Figure 5**

567 *NC Srf<sup>al</sup> conditional mutants succumb postnatally with outflow tract defects*



568 (A) Kaplan-Meyer survival curve for neonatal  $Srf^{flox/flox}; Wnt1-Cre^{Tg/+}$  (Mutant) compared to  
569 littermates of all other genotypes (Control). Significance was computed at each timepoint  
570 using a Mantel-Cox log-rank test. P0  $p=0.0142$ , P1  $p<0.0001$ , P2  $p<0.0001$ . (B) Stacked  
571 columns showing the distribution of PDA-related phenotypes in  $Srf^{flox/flox}; Wnt1-Cre^{Tg/+}$   
572 neonates compared to littermates of all other genotypes. (C) DAPI-stained postnatal day  
573 0 (P0) hearts carrying a  $ROSA26^{Tdt/+}$  Cre lineage reporter showing the entire heart (top  
574 row) and the outflow tract region (bottom row). Examples of mutant phenotypes such as  
575 PDA, ARSA, and RAA. An asterisk indicates where the missing right subclavian artery  
576 should be. Note the ARSA mouse had succumbed prior to dissection and the image is  
577 dimmer due to the presence of clotted blood. The outflow tract defects are schematized  
578 below. Scale bar represents 500  $\mu\text{m}$ . (D) Hematoxylin and eosin-stained frontal sections  
579 through P0 hearts showing mild to severe PDA and an example of VSD and PTA in  
580 mutants. Scale bar represents 500  $\mu\text{m}$ . (E) Summary of our results, showing the  
581 requirements for SRF versus  $SRF^{\alpha l}$  in different tissues and timepoints. A, aorta; ARSA,  
582 aberrant right subclavian artery; DA, ductus arteriosus; LCA, left common carotid artery;  
583 LSA, left subclavian artery; LV, left ventricle; P, pulmonary artery; PDA, patent ductus  
584 arteriosus; PTA, persistent truncus arteriosus; RAA, right aortic arch with mirror image  
585 branching; RCA, right common carotid artery; RSA, right subclavian artery.

586

### 587 **Figure 1 Supplement 1**

588 *Srf* NC conditional mutants do not show early patterning defects

589 E10.5 embryos subject to *in situ* hybridization using probes against *Msx1*, *Alx3*, *Six3*,  
590 *Shh*, and *Fgf8* showed no significant differences between *Srf* NC conditional mutants and

591 control littermates. *Msx1* embryos are shown in  $\frac{3}{4}$  view to highlight maxillary expression.  
592 *Fgf8* embryos are shown in frontal and profile views to highlight the ventral forebrain and  
593 mandibular expression domains, respectively. Scale bar represents 500  $\mu\text{m}$ .

594

## 595 **Figure 1 Supplement 2**

596 *Additional data related to craniofacial RNA-Seq*

597 (A) Volcano plot showing genes enriched in mandible (red) versus FNP (blue) tissue. (B)  
598 Individual transcripts per million reads (TPM) values for *Hand2* and *Six3* plotted by  
599 genotype, showing the expected tissue enrichment. (C) PCA plots for the individual  
600 samples showing PCA1 vs PCA2 (left) and PCA1 vs PCA3 (right) indicate separation of  
601 the samples by tissue (PCA1) and genotype (PCA3). Samples are color-coded by  
602 genotype. (D) TPM values of *Srf* and several affected genes plotted by genotype. While  
603 *Srf* levels vary somewhat among the non-clefted control genotypes, downstream targets  
604 are only affected in the conditional mutants. (E) Overlap of DEGs from mandible (pink),  
605 FNP (cyan), and a joint model using both tissues (yellow). (F) Enrichr GSEA for  
606 upregulated genes with  $q \leq 0.05$  and  $\text{Log}_2\text{FC} \geq 0.25$  from the joint model shows little  
607 enrichment and such genes may therefore be indirect targets of SRF. (G) Enrichr GSEA  
608 using a list of genes with  $q \leq 0.05$  and  $\text{Log}_2\text{FC} \leq -0.25$  from each tissue showing similar  
609 terms to the joint model, with the exception of cholesterol-related GO terms specific to the  
610 FNP dataset. (H) GSEA for mandible and FNP samples compared to known SRF, MRTF,  
611 and TCF targets (Esnault et al., 2014; Gualdrini et al., 2016) showing preferential  
612 enrichment for MRTF targets in both datasets. Columns are the mean and error bars  
613 represent the standard deviation in (B) and (D).

614

615 **Figure 2 Supplement 1**

616 *Targeting strategy and validation for Srf<sup>Flag</sup> and Srf<sup>αI</sup> alleles*

617 (A) A diagram of the targeting vector and the *Srf* locus. Homology arms containing an N-  
618 terminal 3x FLAG tag with or without mutated SRF αI residues were cloned into a  
619 targeting vector containing a *Pgk-NeoR* cassette flanked by loxP (l) and FRT (F)  
620 sequences. Dotted lines demarcate the homology arms relative to the endogenous locus.  
621 Exons are dark and UTR regions are striped. The FLAG tag is green and the location of  
622 the SRF αI residues is marked by red arrowheads. Autoregulatory CarG elements at -62  
623 bp, -82 bp, and +2800 bp are marked by blue asterisks. (B) Southern blot of SspI digested  
624 targeted clones and WT genomic DNA blotted with the P32 labeled DNA probe indicated  
625 in (A). (C) Diagram of mouse SRF protein showing the DNA-binding domain as a dark  
626 box, the core MADS domain within it is labeled, subdomains are indicated underneath,  
627 and the SRF αI mutations are red arrowheads. Domains are based on Zaromytidou et al.  
628 (2006) with amino acid numbers adjusted for mouse. The 3x FLAG tag (not shown) was  
629 inserted just downstream of the start codon.

630

631 **Figure 2 Supplement 2**

632 *SRF αI helix residues are highly conserved, but drift in clades lacking clear MRTF*  
633 *homologues*

634 Representative species from major clades were subjected to BLASTP searches for  
635 mouse SRF, MRTF-B, and ELK1. The presence of a reciprocal best BLASTP hit is  
636 denoted in green. If a hit was negative, the search was repeated for the entire clade and

637 identification of a hit is represented in cyan. Negative hits for ELK1 were researched with  
638 mouse ETS1 to find any ETS domain proteins. SRF  $\alpha$ I residues were manually inspected  
639 and divergence is denoted by the height of the green bar in 25% increments, representing  
640 the four residues. Red arrows indicate clades where the SRF  $\alpha$ I residues diverge that are  
641 also missing readily identifiable MRTF homologs, although some of these lineages also  
642 lack TCF/ELK homologs. Blue arrows indicate clades where SRF  $\alpha$ I residues are  
643 conserved along with presence of an MRTF homolog, but that lack an obvious TCF/ELK  
644 homolog. The asterisk indicates that although a reciprocal best BLASTP hit for MRTF-B  
645 was found in *S. rosetta*, the hit was a short protein fragment and it is unclear if it represents  
646 a true MRTF homolog. The genus *Caenorhabditis* lacks an obvious MRTF homolog, but  
647 likely MRTF homologs can be found in other nematodes such as *B. malayi*, *L. loa*, and *O.*  
648 *flexuosa*.

649

#### 650 **Figure 4 Supplement 1**

651 *MRTF-A translocates to the nucleus normally in response to serum stimulation in mutant*  
652 *MEPM cells*

653 (A) Serum starved or stimulated P2 primary MEPM cells from *Srf <sup>$\alpha$ I/flox</sup>*; *Wnt1-Cre<sup>Tg/+</sup>*;  
654 *ROSA26<sup>TdT/+</sup>* (mutant) and *Srf<sup>flox/+</sup>*; *Wnt1-Cre<sup>Tg/+</sup>*; *ROSA26<sup>TdT/+</sup>* (control) embryos were  
655 stained for MRTF-A and DAPI. (B) Nuclear MRTF-A levels were quantified using the DAPI  
656 channel to identify nuclei. Dots represent individual cells pooled from n=2 unique cell lines  
657 for each genotype. Horizontal bars are the mean and error bars represent the standard  
658 deviation.

659

660 **Figure 5 Supplement 1**

661 *E18.5 conditional mutant skulls are delayed but correctly patterned*

662 Alizarin red (bone) and alcian blue (cartilage) stained E18.5 skulls of the indicated  
663 genotypes from two litters are shown. All three conditional mutant embryos were smaller  
664 than their control littermates and had less extensive ossification. However, all the  
665 indicated bones were present in each genotype, except for the presphenoid bone, which  
666 was missing in 2/3 mutants (location of missing bone indicated in bold) and rudimentary  
667 in one (italics). Bo, basioccipital; bs, basisphenoid; eo, exoccipital; etm, ectotympanic;  
668 fmx, frontal process of maxilla; fr, frontal; h, hyoid; ip, interparietal; jg, jugal; m, mandible;  
669 mx, maxilla; na, nasal; pl, palatine; pmx, premaxilla; ppmx, palatal process of maxilla;  
670 pppl, palatal process of palatine; pppmx, palatal process of premaxilla; pr, parietal; ps,  
671 presphenoid; ptg, pterygoid; rtp, retrotympenic process; so, supraoccipital; sq,  
672 squamosal; zpmx, zygomatic process of maxilla.

673

674 **Figure 5 Supplement 2**

675 *Pdgfra and Srf<sup>α1</sup> do not interact genetically in NC*

676 (A) Expected and recovered numbers of embryos of each genotype at birth (P0). No  
677 significant deviation from Mendelian ratios was observed. (B) PDA-related phenotypes in  
678 *Srf<sup>α1/flox</sup>; Wnt1-Cre<sup>Tg/+</sup>* neonates are not exacerbated by the loss of one copy of *Pdgfra*.

679

680 **Table 1**

681 *Srf<sup>α1/α1</sup> embryos are not recovered at weaning*

682 Expected and recovered numbers of embryos of each genotype at weaning (P21). No  
 683 homozygous mutant embryos were recovered.

684

| Reaction                                                   | Primer 1                       | Primer 2                        | Primer 3                    | Primer 4               | WT Product | Mutant Product |
|------------------------------------------------------------|--------------------------------|---------------------------------|-----------------------------|------------------------|------------|----------------|
| <i>Srff<sup>10</sup><sub>x</sub></i>                       | TGCTTACTGGAAAGCT<br>CATGG      | TGCTGGTTTGGCATCA<br>ACT         |                             |                        | 210<br>bp  | 430<br>bp      |
| <i>Srf<sup>-</sup></i>                                     | GCTTACTGGAAAGCTC<br>ATGG       | CTAACCTGCCTGTCC<br>TTCA         |                             |                        |            | 475<br>bp      |
| <i>Srff<sup>LA</sup><sub>G</sub>,<br/>Srf<sup>AI</sup></i> | GATGAACGATGTGACC<br>TCGC       | AGGGAGGAGCCAACCTC<br>CTTA       |                             |                        | 347<br>bp  | 467<br>bp      |
| <i>Pdgfr<sup>a<sup>H2B</sup>-EGFP</sup></i>                | CCCTTGTGGTCATGCC<br>AAAC       | GCTTTTGCCTCCATTA<br>CACTGG      | ACGAAGTTATTAGG<br>TCCCTCGAC |                        | 451<br>bp  | 242<br>bp      |
| <i>Cre</i>                                                 | GCTGCCACGACCAAGT<br>GACAGCAATG | GTAGTTATTCCGGATCA<br>TCAGCTACAC |                             |                        |            | 400<br>bp      |
| <i>MORE-Cre</i>                                            | GGGACCACCTTCTTTT<br>GGCTTC     | AAGATGTGGAGAGTTC<br>GGGGTAG     | CCAGATCCTCCTCA<br>GAAATCAGC |                        | 411<br>bp  | 311<br>bp      |
| <i>ROSA2<sup>6<sup>mTmG</sup></sup></i>                    | CTCTGCTGCCTCCTGG<br>CTTCT      | CGAGGCGGATCACAAG<br>CAATA       | TCAATGGGCGGGGG<br>TCGTT     |                        | 330<br>bp  | 250<br>bp      |
| <i>ROSA2<sup>6<sup>TdT</sup></sup></i>                     | AAGGGAGCTGCAGTGG<br>AGTA       | CCGAAAATCTGTGGGA<br>AGTC        | GGCATTAAAGCAGC<br>GTATCC    | CTGTCCTGTA<br>CGGCATGG | 297<br>bp  | 196<br>bp      |

685

686 **Supplementary Table 1**

687 *Genotyping Primers*

688 A list of genotyping primers and product sizes. All reactions were run for 35 cycles with  
 689 an annealing temperature of 60° C.

690

| Gene         | Forward Primer         | Reverse Primer          | cDNA amplicon | Genomic amplicon |
|--------------|------------------------|-------------------------|---------------|------------------|
| <i>Acta2</i> | GGCACCCTGAACCCTAAGG    | ACAATACCAGTTGTACGTCCAGA | 135 bp        | 1822 bp          |
| <i>Egr1</i>  | TGGGATAACTCGTCTCCACC   | GAGCGAACAACCTATGAGC     | 92 bp         | 770 bp           |
| <i>Fos</i>   | TCCTACTACCATTCCCCAGC   | TGGCACTAGAGACGGACAGA    | 94 bp         | 848 bp           |
| <i>Hprt</i>  | TCCTCCTCAGACCGCTTTT    | CATAACCTGGTTCATCATCGC   | 95 bp         | 10935 bp         |
| <i>Srf</i>   | GTGCCACTGGCTTTGAAGA    | GCAGGTTGGTGACTGTGAAT    | 108 bp        | 1875 bp          |
| <i>Tagln</i> | GACTGCACTTCTCGGCTCAT   | CCGAAGCTACTCTCCTTCCA    | 100 bp        | 4160 bp          |
| <i>Vcl</i>   | TCTGATCCTCAGTGGTCTGAAC | AAAGCCATTCTGACCTCAC     | 103 bp        | 41200 bp         |

691

692 **Supplementary Table 2**

693 *qPCR Primers*

694 Forward and reverse primer sequences used for qPCR experiments in Figure 4D. All  
695 primers are listed 5' to 3'.

696

697 **Supplementary File 1**

698 *RNA-Seq gene lists*

699 A Microsoft Excel file containing gene expression analysis for the mandible, FNP, and  
700 joint mandible+FNP datasets, gene lists used to generate Figure 1G-H, raw counts and  
701 TPM values for each sample, and the variables used for each sample to classify it for  
702 analysis in Sleuth: genotype, tissue, and litter.

703

## 704 **Materials and Methods**

### 705 *Animal Husbandry*

706 All animal experimentation was conducted according to protocols approved by the  
707 Institutional Animal Care and Use Committee of the Icahn School of Medicine at Mount  
708 Sinai. Mice were kept in a dedicated animal vivarium with veterinarian support. They were  
709 housed on a 13hr-11hr light-dark cycle and had access to food and water *ad libitum*.

710

### 711 *Mouse Models*

712 The following previously described mouse lines were used: *H2az2<sup>Tg(wnt1-cre)11Rth</sup>* referred  
713 to as *Wnt1-Cre* (Danielian et al., 1998), *Mesp1<sup>tm2(cre)Ysa</sup>* referred to as *Mesp1<sup>Cre</sup>* (Saga et  
714 al., 1999), *Srf<sup>tm1Rmn</sup>* referred to as *Srf<sup>flox</sup>* (Miano et al., 2004), *Meox2<sup>tm1(cre)Sor</sup>* referred to  
715 as *MORE-Cre* (Tallquist & Soriano, 2000), *Gt(ROSA)26Sor<sup>tm14(CAG-TdTomato)Hze</sup>* referred to  
716 as *R26R<sup>TdT</sup>* (Madisen et al., 2010), and *Gt(ROSA)26Sor<sup>tm4(ACTB-tdTomato,-EGFP)Luo</sup>* referred to  
717 as *R26R<sup>mTmG</sup>* (Muzumdar et al., 2007). *Srf<sup>FLAG</sup>* and *Srf<sup>αl</sup>* mice were generated by gene  
718 targeting. Homology arms of 2kb and 6.4kb were cloned into the pPGKneoF2L2DTA  
719 backbone. The longer arm was assembled in three fragments using HiFi assembly  
720 cloning (NEB) and included a 3x FLAG tag introduced with a primer. Fragments were  
721 amplified from 129S4 gDNA using Q5 polymerase (NEB) except for the middle segment  
722 of the long arm (i.e. the coding sequence of exon 1), which was amplified from a cDNA  
723 clone before or after introducing the αI helix mutations via site-directed mutagenesis. The  
724 targeting constructs were linearized and electroporated in AK7 (129S4 lineage)  
725 embryonic stem cells. Clones were selected with G418, screened by long-range PCR,  
726 and verified by Southern blot. Correctly targeted clones were injected into C57BL6/J E3.5



727 blastocysts, transferred to pseudopregnant F1 (C57BL6/J X 129S4) surrogates, and  
728 chimeras selected based on coat color. Founders were crossed to *MORE-Cre* mice to  
729 remove the *NeoR* cassette (Tallquist & Soriano, 2000). All mice were analyzed on a  
730 129S4 co-isogenic background. Genotyping primers are available in Supplementary  
731 Table 1.

732

### 733 *Conservation*

734 Representative species from the various taxa were subject to BLASTP searches with  
735 default parameters using the amino acid sequences for mouse SRF, MKL2, and ELK1.  
736 Potential hits were then confirmed by reciprocal BLASTP back to mouse. If a species  
737 lacked an ELK1 homolog, the mouse ETS1 sequence was used to search for ETS-  
738 domain containing genes. If the given species lacked a hit for a particular search, the  
739 search was repeated for the entire taxon. Ctenophora were searched using amino acid  
740 sequences for mouse SRF and MEF2C, yeast MCM2, snapdragon Deficiens, and  
741 Arabidopsis Agamous. No homolog was identified, suggesting loss of MADS proteins in  
742 this lineage.

743

### 744 *RNA Sequencing*

745 FNPs (LNP + MNP) and mandibles were carefully removed from E11.5 embryos in ice-  
746 cold PBS using fine forceps. A total of eight embryos across two litters representing four  
747 mutants and four controls were collected. Total RNA was immediately extracted using the  
748 RNeasy Plus Mini kit (Qiagen). RNA quality was assessed by TapeStation and all samples

749 had RIN scores  $\geq 9.8$ . Samples were sent to GeneWiz for PE150 sequencing. There were  
750 14.6-30m reads / sample and an average of 24.2m reads / sample.

751

752 Reads were pseudo-aligned to the mouse transcriptome (mm10 partial selective  
753 alignment method, downloaded from refgenie) using salmon 1.5.0 and the flags –  
754 validateMappings –gcBias –numBootstraps 30. Pseudoalignments were processed with  
755 wasabi 1.0.1 and analyzed with sleuth 0.30.0-4 with the flag gene\_mode=true. Analysis  
756 was performed using a full model that accounted for genotype, litter/batch, and tissue-of-  
757 origin (for combined tissue analysis only) versus a reduced model consisting only of  
758 litter/batch (and tissue-of-origin). Fold-changes and q-values were computed using the  
759 Wald test. Volcano plots were made with VolcaNoseR. Heat maps were generated using  
760 the Shinyapp HeatMappr. Gene set enrichment analysis for GO terms, ENCODE  
761 datasets, etc. were done with the web utility Enrichr (Xie et al., 2021). Enrichment for a  
762 custom list of targets was performed using GSEA software 4.10 and normalized read  
763 counts for the entire dataset. Analysis for the joint tissue model was run in phenotype  
764 mode (>7 samples per condition) and for the individual tissue samples in gene\_set mode  
765 (<7 samples per condition) according to the software developer. The maximum number  
766 of genes per set was raised to 800 to accommodate the target lists. All other parameters  
767 were default.

768

### 769 *MEPM Culture*

770 Mouse embryonic palatal mesenchyme cells were generated as described (Fantauzzo &  
771 Soriano, 2017). Briefly, palatal shelves were dissected from E13.5 embryos in ice cold

772 PBS using fine forceps. Yolk sac tissue was used for genotyping. Palates from individual  
773 embryos were held on ice until dissection was complete and palates were then  
774 dissociated using 0.125% Trypsin-EDTA at 37° C for 10 minutes with occasional  
775 trituration using a P1000 pipet. Trypsin was neutralized with an equal volume of growth  
776 media (DMEM High Glucose supplemented with Glutamine, Penicillin-Streptomycin, and  
777 10% Fetal Calf III serum) and plated onto culture dishes coated in 0.1% gelatin. Cells  
778 were passaged as they approached confluency, every 2-3 days, and used for  
779 experiments at passage 2.

780

#### 781 *Immunofluorescence*

782 MEPM cells were seeded on #1.5 coverslips coated with 0.1% gelatin. For starvation  
783 experiments, cells were starved overnight in 0.1% serum then stimulated 30' with 10%  
784 serum. Cells were fixed using 4% PFA in PBS for 10' at 37° C. Embryos were dissected  
785 in ice cold PBS, fixed one hour in 4% PFA in PBS at 4° C, rinsed in PBS, cryoprotected  
786 in 30% sucrose, and embedded in OCT. Sections were cut at 10 um thickness using a  
787 Leica cryostat. Yolk sacs were fixed one hour in 4% PFA in PBS at 4° C and stained  
788 whole. All samples were rinsed in PBS, blocked and permeabilized in blocking media  
789 (PBS, 0.3% TritonX-100, 1% BSA, 5% calf serum) one hour at RT, primary antibody was  
790 diluted in fresh blocking media and samples treated overnight at 4° C, washed 3x PBS at  
791 RT, incubated in Alexa Fluor Plus-conjugated secondary antibodies (Invitrogen) diluted  
792 1:500 in fresh blocking media with 1 µg/ml DAPI for 1-2 hours at RT or overnight at 4° C,  
793 and finally washed 3x in PBS at RT. Samples were mounted in Prolong Diamond  
794 (Invitrogen) mounting media and imaged on a Zeiss AxioObserver inverted fluorescence

795 microscope or a Zeiss 780 upright confocal microscope. Thresholding was performed and  
796 scalebars added in the FIJI implementation of ImageJ. All images for a given experiment  
797 were processed identically.

798

799 Quantitation of cell proliferation and cell death was performed by staining frozen sections  
800 with the indicated antibodies. Sections at the level of the heart were imaged using a 10x  
801 objective on a Zeiss 780 confocal microscope, a 1024x1024 pixel count and 6 um step  
802 size. Tiling was used with 10% overlap when necessary to image the entire section.  
803 Maximum intensity projections were made in the FIJI implementation of ImageJ and  
804 identical thresholds used for each embryo to calculate the DAPI-positive and cleaved  
805 Caspase 3-positive or phospho-Histone H3 (Ser 10)-positive area on sections at the level  
806 of the heart. Any of the embryo's posterior present in the section was ignored as this  
807 region was not present in all sections for all embryos.

808

809 Antibodies used were rabbit anti  $\beta$ -Catenin (Cell Signaling, 8480) 1:200, rat anti-CD31  
810 (BD Pharmingen, 553370) 1:50, rabbit anti-cleaved Caspase 3 (Cell Signaling 9665,  
811 1:400), rabbit anti-phospho Histone H3 (Ser10) (Millipore 06-570, 1:500), rabbit anti-  
812 MKL1 (Proteintech, 21166-1-AP) 1:100, rabbit anti-SMA (Cell Signaling, 19245) 1:200.  
813 Phalloidin-Alexa Fluor 647 (Invitrogen) was included where indicated during secondary  
814 antibody staining at 1:400.

815

816 *RT-qPCR*

817 Cells were seeded, passaged, starved, and stimulated as for immunofluorescence except  
818 in 12-well tissue culture plates. Embryo facial prominences were dissected in cold PBS  
819 and transferred to 1.5 ml microfuge tubes on ice. Following the indicated stimulation  
820 regimes when applicable, cells/tissue were lysed in 300  $\mu$ l RLT buffer supplemented with  
821 BME, and RNA isolated using the RNeasy Plus Kit (Qiagen) according to the  
822 manufacturer's instructions. RNA concentration was quantified using a Nanodrop. 1  $\mu$ g  
823 total RNA was used for reverse transcription. RNA was primed using a 2:1 molar ratio of  
824 random hexamer and polydT (Invitrogen) and reverse transcribed with Superscript IV  
825 (Invitrogen) according to the manufacture's protocol. Resulting cDNA was diluted 5x with  
826 water and stored at -20° C. 1  $\mu$ l cDNA was used per qPCR reaction. qPCR was performed  
827 using Luna 2x Master Mix (NEB) on an iQ5 thermocycler (Bio-Rad) in triplicate.  
828 Differences in gene expression were calculated by  $\Delta\Delta$ CT using *Hprt* for normalization.  
829 Primer sequences are listed in Supplementary Table 2.

830

### 831 *Nuclear Translocation Analysis*

832 Cells were starved, treated, and stained as described above and imaged on an inverted  
833 Zeiss AxioObserver microscope. Z-stacks were maximum intensity projected in the FIJI  
834 implementation of ImageJ, background subtracted, and the DAPI channel used to create  
835 a nuclear mask. This mask was then used to measure the average nuclear intensity in  
836 the MRTF-A channel for each nucleus. The data presented are the pooled results from 2  
837 cell lines of each genotype where each dot is an individual nucleus. At least 70 cells were  
838 analyzed per condition.

839

840 *In situ hybridization*

841 E10.5 embryos were dissected in ice-cold PBS and fixed overnight in 4% FA in PBS at  
842 4° C, rinsed in PBS, dehydrated through a MeOH series and stored in 100% MeOH at -  
843 20° C. Embryos were stained using standard techniques for the indicated transcripts using  
844 published, DIG-labeled probes, and were developed in BM Purple (Roche | Sigma-  
845 Aldrich). For *Fgf8* the proteinase-K digestion was omitted in order to maintain integrity of  
846 the ectoderm. Probe sequences and a detailed protocol are available upon request.

847

848 *Histology*

849 P0 hearts were fixed overnight in 4% FA in PBS at 4° C, rinsed in PBS, dehydrated  
850 through an ethanol series, and embedded in paraffin. 5 µm sections were cut using a  
851 Leica microtome. After drying, sections were stained with Harris modified hematoxylin  
852 (Fisher) and Eosin Y using a standard regressive staining protocol.

853

854 *Skeletal Preparations*

855 Skeletons were stained by standard techniques. Briefly, E18.5 embryos were skinned,  
856 eviscerated, fixed in ethanol, stained with .015% alcian blue and .005% alizarin red  
857 overnight at 37° C, cleared in 1% KOH, processed through a glycerol:KOH series, and  
858 photographed in 80% glycerol in PBS.

859

860 *Statistical Methods*

861 Specific statistical methods, significance values, and n are detailed in the figure legends.

862 For RNA-Seq, statistics were computed using the built-in Wald Test function in the Sleuth

863 analysis package. All other statistics were performed using GraphPad Prism 9.

864

865 *Data Availability*

866 Processed and raw RNA-Seq files have been deposited in the Gene Expression Omnibus

867 under the accession number GSE186770.



## 868 References

- 869 Arsenian, S., Weinhold, B., Oelgeschlager, M., Ruther, U., & Nordheim, A. (1998). Serum  
870 response factor is essential for mesoderm formation during mouse embryogenesis.  
871 *EMBO J*, 17(21), 6289-6299. <https://doi.org/10.1093/emboj/17.21.6289>
- 872 Asparuhova, M. B., Ferralli, J., Chiquet, M., & Chiquet-Ehrismann, R. (2011). The transcriptional  
873 regulator megakaryoblastic leukemia-1 mediates serum response factor-independent  
874 activation of tenascin-C transcription by mechanical stress. *FASEB J*, 25(10), 3477-3488.  
875 <https://doi.org/10.1096/fj.11-187310>
- 876 Ayadi, A., Zheng, H., Sobieszczuk, P., Buchwalter, G., Moerman, P., Alitalo, K., & Wasylyk, B.  
877 (2001). Net-targeted mutant mice develop a vascular phenotype and up-regulate egr-1.  
878 *EMBO J*, 20(18), 5139-5152. <https://doi.org/10.1093/emboj/20.18.5139>
- 879 Belaguli, N. S., Sepulveda, J. L., Nigam, V., Charron, F., Nemer, M., & Schwartz, R. J. (2000).  
880 Cardiac tissue enriched factors serum response factor and GATA-4 are mutual  
881 coregulators. *Mol Cell Biol*, 20(20), 7550-7558.  
882 <https://doi.org/10.1128/MCB.20.20.7550-7558.2000>
- 883 Bergwerff, M., Gittenberger-de Groot, A. C., Wisse, L. J., DeRuiter, M. C., Wessels, A., Martin, J.  
884 F., Olson, E. N., & Kern, M. J. (2000). Loss of function of the Prx1 and Prx2 homeobox  
885 genes alters architecture of the great elastic arteries and ductus arteriosus. *Virchows*  
886 *Arch*, 436(1), 12-19. <https://doi.org/10.1007/pl00008193>
- 887 Brachmann, S. M., Yballe, C. M., Innocenti, M., Deane, J. A., Fruman, D. A., Thomas, S. M., &  
888 Cantley, L. C. (2005). Role of phosphoinositide 3-kinase regulatory isoforms in  
889 development and actin rearrangement. *Mol Cell Biol*, 25(7), 2593-2606.  
890 <https://doi.org/10.1128/MCB.25.7.2593-2606.2005>
- 891 Brewer, J. R., Molotkov, A., Mazot, P., Hoch, R. V., & Soriano, P. (2015). Fgfr1 regulates  
892 development through the combinatorial use of signaling proteins. *Genes Dev*, 29(17),  
893 1863-1874. <https://doi.org/10.1101/gad.264994.115>
- 894 Bronner, M. E., & Simoes-Costa, M. (2016). The Neural Crest Migrating into the Twenty-First  
895 Century. *Curr Top Dev Biol*, 116, 115-134. <https://doi.org/10.1016/bs.ctdb.2015.12.003>
- 896 Cenik, B. K., Liu, N., Chen, B., Bezprozvannaya, S., Olson, E. N., & Bassel-Duby, R. (2016).  
897 Myocardin-related transcription factors are required for skeletal muscle development.  
898 *Development*, 143(15), 2853-2861. <https://doi.org/10.1242/dev.135855>
- 899 Cesari, F., Rennekampff, V., Vintersten, K., Vuong, L. G., Seibler, J., Bode, J., Wiebel, F. F., &  
900 Nordheim, A. (2004). Elk-1 knock-out mice engineered by Flp recombinase-mediated  
901 cassette exchange. *Genesis*, 38(2), 87-92. <https://doi.org/10.1002/gene.20003>
- 902 Chen, C. Y., Croissant, J., Majesky, M., Topouzis, S., McQuinn, T., Frankovsky, M. J., & Schwartz,  
903 R. J. (1996). Activation of the cardiac alpha-actin promoter depends upon serum  
904 response factor, Tinman homologue, Nkx-2.5, and intact serum response elements. *Dev*  
905 *Genet*, 19(2), 119-130. [https://doi.org/10.1002/\(SICI\)1520-6408\(1996\)19:2<119::AID-](https://doi.org/10.1002/(SICI)1520-6408(1996)19:2<119::AID-DVG3>3.0.CO;2-C)  
906 [DVG3>3.0.CO;2-C](https://doi.org/10.1002/(SICI)1520-6408(1996)19:2<119::AID-DVG3>3.0.CO;2-C)
- 907 Chen, F., Kook, H., Milewski, R., Gitler, A. D., Lu, M. M., Li, J., Nazarian, R., Schnepf, R., Jen, K.,  
908 Biben, C., Runke, G., Mackay, J. P., Novotny, J., Schwartz, R. J., Harvey, R. P., Mullins, M.  
909 C., & Epstein, J. A. (2002). Hop is an unusual homeobox gene that modulates cardiac  
910 development. *Cell*, 110(6), 713-723. [https://doi.org/10.1016/s0092-8674\(02\)00932-7](https://doi.org/10.1016/s0092-8674(02)00932-7)

- 911 Costello, P., Nicolas, R., Willoughby, J., Wasylyk, B., Nordheim, A., & Treisman, R. (2010).  
912 Ternary complex factors SAP-1 and Elk-1, but not net, are functionally equivalent in  
913 thymocyte development. *J Immunol*, *185*(2), 1082-1092.  
914 <https://doi.org/10.4049/jimmunol.1000472>
- 915 Costello, P. S., Nicolas, R. H., Watanabe, Y., Rosewell, I., & Treisman, R. (2004). Ternary complex  
916 factor SAP-1 is required for Erk-mediated thymocyte positive selection. *Nat Immunol*,  
917 *5*(3), 289-298. <https://doi.org/10.1038/ni1038>
- 918 Creemers, E. E., Sutherland, L. B., Oh, J., Barbosa, A. C., & Olson, E. N. (2006). Coactivation of  
919 MEF2 by the SAP domain proteins myocardin and MASTR. *Mol Cell*, *23*(1), 83-96.  
920 <https://doi.org/10.1016/j.molcel.2006.05.026>
- 921 Danielian, P. S., Muccino, D., Rowitch, D. H., Michael, S. K., & McMahon, A. P. (1998).  
922 Modification of gene activity in mouse embryos in utero by a tamoxifen-inducible form  
923 of Cre recombinase. *Curr Biol*, *8*(24), 1323-1326. [https://doi.org/10.1016/s0960-9822\(07\)00562-3](https://doi.org/10.1016/s0960-9822(07)00562-3)
- 925 Dinsmore, C. J., & Soriano, P. (2018). MAPK and PI3K signaling: At the crossroads of neural crest  
926 development. *Dev Biol*, *444 Suppl 1*, S79-S97.  
927 <https://doi.org/10.1016/j.ydbio.2018.02.003>
- 928 Enkhmandakh, B., Makeyev, A. V., Erdenechimeg, L., Ruddle, F. H., Chimge, N. O., Tussie-Luna,  
929 M. I., Roy, A. L., & Bayarsaihan, D. (2009). Essential functions of the Williams-Beuren  
930 syndrome-associated TFII-I genes in embryonic development. *Proc Natl Acad Sci U S A*,  
931 *106*(1), 181-186. <https://doi.org/10.1073/pnas.0811531106>
- 932 Esnault, C., Gualdrini, F., Horswell, S., Kelly, G., Stewart, A., East, P., Matthews, N., & Treisman,  
933 R. (2017). ERK-Induced Activation of TCF Family of SRF Cofactors Initiates a Chromatin  
934 Modification Cascade Associated with Transcription. *Mol Cell*, *65*(6), 1081-1095 e1085.  
935 <https://doi.org/10.1016/j.molcel.2017.02.005>
- 936 Esnault, C., Stewart, A., Gualdrini, F., East, P., Horswell, S., Matthews, N., & Treisman, R. (2014).  
937 Rho-actin signaling to the MRTF coactivators dominates the immediate transcriptional  
938 response to serum in fibroblasts. *Genes Dev*, *28*(9), 943-958.  
939 <https://doi.org/10.1101/gad.239327.114>
- 940 Espinoza-Lewis, R. A., & Wang, D. Z. (2014). Generation of a Cre knock-in into the Myocardin  
941 locus to mark early cardiac and smooth muscle cell lineages. *Genesis*, *52*(10), 879-887.  
942 <https://doi.org/10.1002/dvg.22819>
- 943 Fantauzzo, K. A., & Soriano, P. (2015). Receptor tyrosine kinase signaling: regulating neural crest  
944 development one phosphate at a time. *Curr Top Dev Biol*, *111*, 135-182.  
945 <https://doi.org/10.1016/bs.ctdb.2014.11.005>
- 946 Fantauzzo, K. A., & Soriano, P. (2017). Generation of an immortalized mouse embryonic palatal  
947 mesenchyme cell line. *PLoS One*, *12*(6), e0179078.  
948 <https://doi.org/10.1371/journal.pone.0179078>
- 949 Feng, Y., Chen, M. H., Moskowitz, I. P., Mendonza, A. M., Vidali, L., Nakamura, F., Kwiatkowski,  
950 D. J., & Walsh, C. A. (2006). Filamin A (FLNA) is required for cell-cell contact in vascular  
951 development and cardiac morphogenesis. *Proc Natl Acad Sci U S A*, *103*(52), 19836-  
952 19841. <https://doi.org/10.1073/pnas.0609628104>
- 953 Fox, J. W., Lamperti, E. D., Eksioğlu, Y. Z., Hong, S. E., Feng, Y., Graham, D. A., Scheffer, I. E.,  
954 Dobyms, W. B., Hirsch, B. A., Radtke, R. A., Berkovic, S. F., Huttenlocher, P. R., & Walsh,

- 955 C. A. (1998). Mutations in filamin 1 prevent migration of cerebral cortical neurons in  
956 human periventricular heterotopia. *Neuron*, 21(6), 1315-1325.  
957 [https://doi.org/10.1016/s0896-6273\(00\)80651-0](https://doi.org/10.1016/s0896-6273(00)80651-0)
- 958 Freddie, C. T., Ji, Z., Marais, A., & Sharrocks, A. D. (2007). Functional interactions between the  
959 Forkhead transcription factor FOXK1 and the MADS-box protein SRF. *Nucleic Acids Res*,  
960 35(15), 5203-5212. <https://doi.org/10.1093/nar/gkm528>
- 961 Grueneberg, D. A., Henry, R. W., Brauer, A., Novina, C. D., Cheriya, V., Roy, A. L., & Gilman, M.  
962 (1997). A multifunctional DNA-binding protein that promotes the formation of serum  
963 response factor/homeodomain complexes: identity to TFII-I. *Genes Dev*, 11(19), 2482-  
964 2493. <https://doi.org/10.1101/gad.11.19.2482>
- 965 Grueneberg, D. A., Natesan, S., Alexandre, C., & Gilman, M. Z. (1992). Human and Drosophila  
966 homeodomain proteins that enhance the DNA-binding activity of serum response factor.  
967 *Science*, 257(5073), 1089-1095. <https://doi.org/10.1126/science.257.5073.1089>
- 968 Gualdrini, F., Esnault, C., Horswell, S., Stewart, A., Matthews, N., & Treisman, R. (2016). SRF Co-  
969 factors Control the Balance between Cell Proliferation and Contractility. *Mol Cell*, 64(6),  
970 1048-1061. <https://doi.org/10.1016/j.molcel.2016.10.016>
- 971 Guo, B., Lyu, Q., Slivano, O. J., Dirx, R., Christie, C. K., Czyzyk, J., Hezel, A. F., Gharavi, A. G.,  
972 Small, E. M., & Miano, J. M. (2018). Serum Response Factor Is Essential for Maintenance  
973 of Podocyte Structure and Function. *J Am Soc Nephrol*, 29(2), 416-422.  
974 <https://doi.org/10.1681/ASN.2017050473>
- 975 Hanna, S., & El-Sibai, M. (2013). Signaling networks of Rho GTPases in cell motility. *Cell Signal*,  
976 25(10), 1955-1961. <https://doi.org/10.1016/j.cellsig.2013.04.009>
- 977 Hipp, L., Beer, J., Kuchler, O., Reisser, M., Sinske, D., Michaelis, J., Gebhardt, J. C. M., & Knoll, B.  
978 (2019). Single-molecule imaging of the transcription factor SRF reveals prolonged  
979 chromatin-binding kinetics upon cell stimulation. *Proc Natl Acad Sci U S A*, 116(3), 880-  
980 889. <https://doi.org/10.1073/pnas.1812734116>
- 981 Houweling, A. C., Beaman, G. M., Postma, A. V., Gainous, T. B., Lichtenbelt, K. D., Brancati, F.,  
982 Lopes, F. M., van der Made, I., Polstra, A. M., Robinson, M. L., Wright, K. D., Ellingford, J.  
983 M., Jackson, A. R., Overwater, E., Genesio, R., Romano, S., Camerota, L., D'Angelo, E.,  
984 Meijers-Heijboer, E. J., Christoffels, V. M., McHugh, K. M., Black, B. L., Newman, W. G.,  
985 Woolf, A. S., & Creemers, E. E. (2019). Loss-of-function variants in myocardin cause  
986 congenital megabladder in humans and mice. *J Clin Invest*, 129(12), 5374-5380.  
987 <https://doi.org/10.1172/JCI128545>
- 988 Huang, J., Cheng, L., Li, J., Chen, M., Zhou, D., Lu, M. M., Proweller, A., Epstein, J. A., &  
989 Parmacek, M. S. (2008). Myocardin regulates expression of contractile genes in smooth  
990 muscle cells and is required for closure of the ductus arteriosus in mice. *J Clin Invest*,  
991 118(2), 515-525. <https://doi.org/10.1172/JCI33304>
- 992 Jimenez, C., Portela, R. A., Mellado, M., Rodriguez-Frade, J. M., Collard, J., Serrano, A., Martinez,  
993 A. C., Avila, J., & Carrera, A. C. (2000). Role of the PI3K regulatory subunit in the control  
994 of actin organization and cell migration. *J Cell Biol*, 151(2), 249-262.  
995 <https://doi.org/10.1083/jcb.151.2.249>
- 996 Kim, D. W., Cheriya, V., Roy, A. L., & Cochran, B. H. (1998). TFII-I enhances activation of the c-  
997 fos promoter through interactions with upstream elements. *Mol Cell Biol*, 18(6), 3310-  
998 3320. <https://doi.org/10.1128/MCB.18.6.3310>

- 999 Kim, T., Hwang, D., Lee, D., Kim, J. H., Kim, S. Y., & Lim, D. S. (2017). MRTF potentiates TEAD-YAP  
1000 transcriptional activity causing metastasis. *EMBO J*, 36(4), 520-535.  
1001 <https://doi.org/10.15252/embj.201695137>
- 1002 Lemmon, M. A., & Schlessinger, J. (2010). Cell signaling by receptor tyrosine kinases. *Cell*,  
1003 141(7), 1117-1134. <https://doi.org/10.1016/j.cell.2010.06.011>
- 1004 Li, J., Bowens, N., Cheng, L., Zhu, X., Chen, M., Hannenhalli, S., Cappola, T. P., & Parmacek, M. S.  
1005 (2012). Myocardin-like protein 2 regulates TGFbeta signaling in embryonic stem cells  
1006 and the developing vasculature. *Development*, 139(19), 3531-3542.  
1007 <https://doi.org/10.1242/dev.082222>
- 1008 Li, J., Zhu, X., Chen, M., Cheng, L., Zhou, D., Lu, M. M., Du, K., Epstein, J. A., & Parmacek, M. S.  
1009 (2005). Myocardin-related transcription factor B is required in cardiac neural crest for  
1010 smooth muscle differentiation and cardiovascular development. *Proc Natl Acad Sci U S*  
1011 *A*, 102(25), 8916-8921. <https://doi.org/10.1073/pnas.0503741102>
- 1012 Li, S., Chang, S., Qi, X., Richardson, J. A., & Olson, E. N. (2006). Requirement of a myocardin-  
1013 related transcription factor for development of mammary myoepithelial cells. *Mol Cell*  
1014 *Biol*, 26(15), 5797-5808. <https://doi.org/10.1128/MCB.00211-06>
- 1015 Li, S., Czubyrt, M. P., McAnally, J., Bassel-Duby, R., Richardson, J. A., Wiebel, F. F., Nordheim, A.,  
1016 & Olson, E. N. (2005). Requirement for serum response factor for skeletal muscle  
1017 growth and maturation revealed by tissue-specific gene deletion in mice. *Proc Natl Acad*  
1018 *Sci U S A*, 102(4), 1082-1087. <https://doi.org/10.1073/pnas.0409103102>
- 1019 Li, S., Wang, D. Z., Wang, Z., Richardson, J. A., & Olson, E. N. (2003). The serum response factor  
1020 coactivator myocardin is required for vascular smooth muscle development. *Proc Natl*  
1021 *Acad Sci U S A*, 100(16), 9366-9370. <https://doi.org/10.1073/pnas.1233635100>
- 1022 Liu, Z. P., Wang, Z., Yanagisawa, H., & Olson, E. N. (2005). Phenotypic modulation of smooth  
1023 muscle cells through interaction of Foxo4 and myocardin. *Dev Cell*, 9(2), 261-270.  
1024 <https://doi.org/10.1016/j.devcel.2005.05.017>
- 1025 Lu, M. F., Cheng, H. T., Kern, M. J., Potter, S. S., Tran, B., Diekwisch, T. G., & Martin, J. F. (1999).  
1026 prx-1 functions cooperatively with another paired-related homeobox gene, prx-2, to  
1027 maintain cell fates within the craniofacial mesenchyme. *Development*, 126(3), 495-504.  
1028 <https://www.ncbi.nlm.nih.gov/pubmed/9876178>
- 1029 Madisen, L., Zwingman, T. A., Sunkin, S. M., Oh, S. W., Zariwala, H. A., Gu, H., Ng, L. L., Palmiter,  
1030 R. D., Hawrylycz, M. J., Jones, A. R., Lein, E. S., & Zeng, H. (2010). A robust and high-  
1031 throughput Cre reporting and characterization system for the whole mouse brain. *Nat*  
1032 *Neurosci*, 13(1), 133-140. <https://doi.org/10.1038/nn.2467>
- 1033 Mengmeng, X., Yuejuan, X., Sun, C., Yanan, L., Fen, L., & Kun, S. (2020). Novel mutations of the  
1034 SRF gene in Chinese sporadic conotruncal heart defect patients. *BMC Med Genet*, 21(1),  
1035 95. <https://doi.org/10.1186/s12881-020-01032-y>
- 1036 Miano, J. M. (2003). Serum response factor: toggling between disparate programs of gene  
1037 expression. *J Mol Cell Cardiol*, 35(6), 577-593. [https://doi.org/10.1016/s0022-2828\(03\)00110-x](https://doi.org/10.1016/s0022-2828(03)00110-x)
- 1038
- 1039 Miano, J. M., Ramanan, N., Georger, M. A., de Mesy Bentley, K. L., Emerson, R. L., Balza, R. O.,  
1040 Jr., Xiao, Q., Weiler, H., Ginty, D. D., & Misra, R. P. (2004). Restricted inactivation of  
1041 serum response factor to the cardiovascular system. *Proc Natl Acad Sci U S A*, 101(49),  
1042 17132-17137. <https://doi.org/10.1073/pnas.0406041101>



- 1043 Minoux, M., Holwerda, S., Vitobello, A., Kitazawa, T., Kohler, H., Stadler, M. B., & Rijli, F. M.  
1044 (2017). Gene bivalency at Polycomb domains regulates cranial neural crest positional  
1045 identity. *Science*, 355(6332). <https://doi.org/10.1126/science.aal2913>
- 1046 Miralles, F., Posern, G., Zaromytidou, A. I., & Treisman, R. (2003). Actin dynamics control SRF  
1047 activity by regulation of its coactivator MAL. *Cell*, 113(3), 329-342.  
1048 [https://doi.org/10.1016/s0092-8674\(03\)00278-2](https://doi.org/10.1016/s0092-8674(03)00278-2)
- 1049 Mohun, T. J., Chambers, A. E., Towers, N., & Taylor, M. V. (1991). Expression of genes encoding  
1050 the transcription factor SRF during early development of *Xenopus laevis*: identification  
1051 of a CARG box-binding activity as SRF. *EMBO J*, 10(4), 933-940.  
1052 <https://www.ncbi.nlm.nih.gov/pubmed/2009862>
- 1053 Morin, S., Paradis, P., Aries, A., & Nemer, M. (2001). Serum response factor-GATA ternary  
1054 complex required for nuclear signaling by a G-protein-coupled receptor. *Mol Cell Biol*,  
1055 21(4), 1036-1044. <https://doi.org/10.1128/MCB.21.4.1036-1044.2001>
- 1056 Muzumdar, M. D., Tasic, B., Miyamichi, K., Li, L., & Luo, L. (2007). A global double-fluorescent  
1057 Cre reporter mouse. *Genesis*, 45(9), 593-605. <https://doi.org/10.1002/dvg.20335>
- 1058 Mylona, A., Theillet, F. X., Foster, C., Cheng, T. M., Miralles, F., Bates, P. A., Selenko, P., &  
1059 Treisman, R. (2016). Opposing effects of Elk-1 multisite phosphorylation shape its  
1060 response to ERK activation. *Science*, 354(6309), 233-237.  
1061 <https://doi.org/10.1126/science.aad1872>
- 1062 Newbern, J., Zhong, J., Wickramasinghe, R. S., Li, X., Wu, Y., Samuels, I., Cherosky, N., Karlo, J.  
1063 C., O'Loughlin, B., Wikenheiser, J., Gargasha, M., Doughman, Y. Q., Charron, J., Ginty, D.  
1064 D., Watanabe, M., Saitta, S. C., Snider, W. D., & Landreth, G. E. (2008). Mouse and  
1065 human phenotypes indicate a critical conserved role for ERK2 signaling in neural crest  
1066 development. *Proc Natl Acad Sci U S A*, 105(44), 17115-17120.  
1067 <https://doi.org/10.1073/pnas.0805239105>
- 1068 Niu, Z., Yu, W., Zhang, S. X., Barron, M., Belaguli, N. S., Schneider, M. D., Parmacek, M.,  
1069 Nordheim, A., & Schwartz, R. J. (2005). Conditional mutagenesis of the murine serum  
1070 response factor gene blocks cardiogenesis and the transcription of downstream gene  
1071 targets. *J Biol Chem*, 280(37), 32531-32538. <https://doi.org/10.1074/jbc.M501372200>
- 1072 Norman, C., Runswick, M., Pollock, R., & Treisman, R. (1988). Isolation and properties of cDNA  
1073 clones encoding SRF, a transcription factor that binds to the c-fos serum response  
1074 element. *Cell*, 55(6), 989-1003. [https://doi.org/10.1016/0092-8674\(88\)90244-9](https://doi.org/10.1016/0092-8674(88)90244-9)
- 1075 Oh, J., Richardson, J. A., & Olson, E. N. (2005). Requirement of myocardin-related transcription  
1076 factor-B for remodeling of branchial arch arteries and smooth muscle differentiation.  
1077 *Proc Natl Acad Sci U S A*, 102(42), 15122-15127.  
1078 <https://doi.org/10.1073/pnas.0507346102>
- 1079 Panayiotou, R., Miralles, F., Pawlowski, R., Diring, J., Flynn, H. R., Skehel, M., & Treisman, R.  
1080 (2016). Phosphorylation acts positively and negatively to regulate MRTF-A subcellular  
1081 localisation and activity. *Elife*, 5. <https://doi.org/10.7554/eLife.15460>
- 1082 Parlakian, A., Tuil, D., Hamard, G., Tavernier, G., Hentzen, D., Concordet, J. P., Paulin, D., Li, Z., &  
1083 Daegelen, D. (2004). Targeted inactivation of serum response factor in the developing  
1084 heart results in myocardial defects and embryonic lethality. *Mol Cell Biol*, 24(12), 5281-  
1085 5289. <https://doi.org/10.1128/MCB.24.12.5281-5289.2004>

- 1086 Parmacek, M. S. (2007). Myocardin-related transcription factors: critical coactivators regulating  
1087 cardiovascular development and adaptation. *Circ Res*, 100(5), 633-644.  
1088 <https://doi.org/10.1161/01.RES.0000259563.61091.e8>
- 1089 Perez-Garcia, V., Fineberg, E., Wilson, R., Murray, A., Mazzeo, C. I., Tudor, C., Sienerth, A.,  
1090 White, J. K., Tuck, E., Ryder, E. J., Gleeson, D., Siragher, E., Wardle-Jones, H., Staudt, N.,  
1091 Wali, N., Collins, J., Geyer, S., Busch-Nentwich, E. M., Galli, A., Smith, J. C., Robertson, E.,  
1092 Adams, D. J., Weninger, W. J., Mohun, T., & Hemberger, M. (2018). Placentation defects  
1093 are highly prevalent in embryonic lethal mouse mutants. *Nature*, 555(7697), 463-468.  
1094 <https://doi.org/10.1038/nature26002>
- 1095 Posern, G., & Treisman, R. (2006). Actin' together: serum response factor, its cofactors and the  
1096 link to signal transduction. *Trends Cell Biol*, 16(11), 588-596.  
1097 <https://doi.org/10.1016/j.tcb.2006.09.008>
- 1098 Rogers, C. D., & Nie, S. (2018). Specifying neural crest cells: From chromatin to morphogens and  
1099 factors in between. *Wiley Interdiscip Rev Dev Biol*, 7(5), e322.  
1100 <https://doi.org/10.1002/wdev.322>
- 1101 Saga, Y., Miyagawa-Tomita, S., Takagi, A., Kitajima, S., Miyazaki, J., & Inoue, T. (1999). MesP1 is  
1102 expressed in the heart precursor cells and required for the formation of a single heart  
1103 tube. *Development*, 126(15), 3437-3447.  
1104 <https://www.ncbi.nlm.nih.gov/pubmed/10393122>
- 1105 Shin, C. H., Liu, Z. P., Passier, R., Zhang, C. L., Wang, D. Z., Harris, T. M., Yamagishi, H.,  
1106 Richardson, J. A., Childs, G., & Olson, E. N. (2002). Modulation of cardiac growth and  
1107 development by HOP, an unusual homeodomain protein. *Cell*, 110(6), 725-735.  
1108 [https://doi.org/10.1016/s0092-8674\(02\)00933-9](https://doi.org/10.1016/s0092-8674(02)00933-9)
- 1109 Smith, E. C., Thon, J. N., Devine, M. T., Lin, S., Schulz, V. P., Guo, Y., Massaro, S. A., Halene, S.,  
1110 Gallagher, P., Italiano, J. E., Jr., & Krause, D. S. (2012). MKL1 and MKL2 play redundant  
1111 and crucial roles in megakaryocyte maturation and platelet formation. *Blood*, 120(11),  
1112 2317-2329. <https://doi.org/10.1182/blood-2012-04-420828>
- 1113 Sun, Q., Chen, G., Streb, J. W., Long, X., Yang, Y., Stoeckert, C. J., Jr., & Miano, J. M. (2006).  
1114 Defining the mammalian CARGome. *Genome Res*, 16(2), 197-207.  
1115 <https://doi.org/10.1101/gr.4108706>
- 1116 Sun, Y., Boyd, K., Xu, W., Ma, J., Jackson, C. W., Fu, A., Shillingford, J. M., Robinson, G. W.,  
1117 Hennighausen, L., Hitzler, J. K., Ma, Z., & Morris, S. W. (2006). Acute myeloid leukemia-  
1118 associated Mkl1 (Mrtf-a) is a key regulator of mammary gland function. *Mol Cell Biol*,  
1119 26(15), 5809-5826. <https://doi.org/10.1128/MCB.00024-06>
- 1120 Tallquist, M. D., & Soriano, P. (2000). Epiblast-restricted Cre expression in MORE mice: a tool to  
1121 distinguish embryonic vs. extra-embryonic gene function. *Genesis*, 26(2), 113-115.  
1122 [https://doi.org/10.1002/\(sici\)1526-968x\(200002\)26:2<113::aid-gene3>3.0.co;2-2](https://doi.org/10.1002/(sici)1526-968x(200002)26:2<113::aid-gene3>3.0.co;2-2)
- 1123 Tallquist, M. D., & Soriano, P. (2003). Cell autonomous requirement for PDGFRalpha in  
1124 populations of cranial and cardiac neural crest cells. *Development*, 130(3), 507-518.  
1125 <https://doi.org/10.1242/dev.00241>
- 1126 Trembley, M. A., Velasquez, L. S., de Mesy Bentley, K. L., & Small, E. M. (2015). Myocardin-  
1127 related transcription factors control the motility of epicardium-derived cells and the  
1128 maturation of coronary vessels. *Development*, 142(1), 21-30.  
1129 <https://doi.org/10.1242/dev.116418>



- 1130 Vasudevan, H. N., & Soriano, P. (2014). SRF regulates craniofacial development through  
1131 selective recruitment of MRTF cofactors by PDGF signaling. *Dev Cell*, 31(3), 332-344.  
1132 <https://doi.org/10.1016/j.devcel.2014.10.005>
- 1133 Wang, Z., Wang, D. Z., Hockemeyer, D., McAnally, J., Nordheim, A., & Olson, E. N. (2004).  
1134 Myocardin and ternary complex factors compete for SRF to control smooth muscle gene  
1135 expression. *Nature*, 428(6979), 185-189. <https://doi.org/10.1038/nature02382>
- 1136 Weinl, C., Wasylyk, C., Garcia Garrido, M., Sothilingam, V., Beck, S. C., Riehle, H., Stritt, C., Roux,  
1137 M. J., Seeliger, M. W., Wasylyk, B., & Nordheim, A. (2014). Elk3 deficiency causes  
1138 transient impairment in post-natal retinal vascular development and formation of  
1139 tortuous arteries in adult murine retinæ. *PLoS One*, 9(9), e107048.  
1140 <https://doi.org/10.1371/journal.pone.0107048>
- 1141 Xie, Z., Bailey, A., Kuleshov, M. V., Clarke, D. J. B., Evangelista, J. E., Jenkins, S. L., Lachmann, A.,  
1142 Wojciechowicz, M. L., Kropiwnicki, E., Jagodnik, K. M., Jeon, M., & Ma'ayan, A. (2021).  
1143 Gene Set Knowledge Discovery with Enrichr. *Curr Protoc*, 1(3), e90.  
1144 <https://doi.org/10.1002/cpz1.90>
- 1145 Zaromytidou, A. I., Miralles, F., & Treisman, R. (2006). MAL and ternary complex factor use  
1146 different mechanisms to contact a common surface on the serum response factor DNA-  
1147 binding domain. *Mol Cell Biol*, 26(11), 4134-4148. [https://doi.org/10.1128/MCB.01902-  
1148 05](https://doi.org/10.1128/MCB.01902-05)  
1149
